# Supplementary material for: Synthesis of terminally modified oligonucleotides and their hybridization dependence on the size of the target RNAs
Source: Royal Society of Chemistry journal article supplement (doi:10.1039/b900301k), 2009-01-01
Supplement: b900301k.pdf [file b900301k.pdf]

## Supporting Information

### Synthesis of the Terminally Modified Oligonucleotides and Their Hybridization Dependent on the Size of the Target RNAs

Kohji Seio\*, Yusuke Takaku, Kazuya Miyazaki, Yoshiaki  
MasakiAkihiro Ohkubo and Mitsuo Sekine\*

*Department of Life Science, Tokyo Institute of Technology 4259  
Nagatsuta-cho, Midori-ku, Yokohama 226-8501, Japan*

kseio@bio.titech.ac.jp

msekine@bio.titech.ac.jp

#### Contents

|                                                 |     |
|-------------------------------------------------|-----|
| <sup>1</sup> H-NMR Spectrum of <b>1a</b> -----  | S3  |
| <sup>13</sup> C-NMR Spectrum of <b>1a</b> ----- | S4  |
| <sup>31</sup> P-NMR Spectrum of <b>1a</b> ----- | S5  |
| <sup>1</sup> H-NMR Spectrum of <b>1b</b> -----  | S6  |
| <sup>13</sup> C-NMR Spectrum of <b>1b</b> ----- | S7  |
| <sup>31</sup> P-NMR Spectrum of <b>1b</b> ----- | S8  |
| <sup>1</sup> H-NMR Spectrum of <b>1c</b> -----  | S9  |
| <sup>13</sup> C-NMR Spectrum of <b>1c</b> ----- | S10 |
| <sup>31</sup> P-NMR Spectrum of <b>1c</b> ----- | S11 |
| <sup>1</sup> H-NMR Spectrum of <b>1d</b> -----  | S12 |
| <sup>13</sup> C-NMR Spectrum of <b>1d</b> ----- | S13 |
| <sup>31</sup> P-NMR Spectrum of <b>1d</b> ----- | S14 |
| <sup>1</sup> H-NMR Spectrum of <b>1e</b> -----  | S15 |
| <sup>13</sup> C-NMR Spectrum of <b>1e</b> ----- | S16 |
| <sup>31</sup> P-NMR Spectrum of <b>1e</b> ----- | S17 |
| <sup>1</sup> H-NMR Spectrum of <b>1f</b> -----  | S18 |
| <sup>13</sup> C-NMR Spectrum of <b>1f</b> ----- | S19 |
| <sup>31</sup> P-NMR Spectrum of <b>1f</b> ----- | S20 |
| <sup>1</sup> H-NMR Spectrum of <b>2a</b> -----  | S21 |
| <sup>13</sup> C-NMR Spectrum of <b>2a</b> ----- | S22 |
| <sup>1</sup> H-NMR Spectrum of <b>2b</b> -----  | S23 |

|                                                                      |       |     |
|----------------------------------------------------------------------|-------|-----|
| <sup>13</sup> C-NMR Spectrum of <b>2b</b>                            | ----- | S24 |
| <sup>1</sup> H-NMR Spectrum of <b>2c</b>                             | ----- | S25 |
| <sup>13</sup> C-NMR Spectrum of <b>2c</b>                            | ----- | S26 |
| <sup>1</sup> H-NMR Spectrum of <b>2d</b>                             | ----- | S27 |
| <sup>13</sup> C-NMR Spectrum of <b>2d</b>                            | ----- | S28 |
| <sup>1</sup> H-NMR Spectrum of <b>3a</b>                             | ----- | S29 |
| <sup>13</sup> C-NMR Spectrum of <b>3a</b>                            | ----- | S30 |
| <sup>1</sup> H-NMR Spectrum of <b>3b</b>                             | ----- | S31 |
| <sup>13</sup> C-NMR Spectrum of <b>3b</b>                            | ----- | S32 |
| <sup>1</sup> H-NMR Spectrum of <b>3c</b>                             | ----- | S33 |
| <sup>13</sup> C-NMR Spectrum of <b>3c</b>                            | ----- | S34 |
| <sup>1</sup> H-NMR Spectrum of <b>3d</b>                             | ----- | S35 |
| <sup>13</sup> C-NMR Spectrum of <b>3d</b>                            | ----- | S36 |
| <sup>1</sup> H-NMR Spectrum of <b>2e</b>                             | ----- | S37 |
| <sup>13</sup> C-NMR Spectrum of <b>2e</b>                            | ----- | S38 |
| <sup>1</sup> H-NMR Spectrum of <b>3e</b>                             | ----- | S39 |
| <sup>13</sup> C-NMR Spectrum of <b>3e</b>                            | ----- | S40 |
| <sup>1</sup> H-NMR Spectrum of <b>5</b>                              | ----- | S41 |
| <sup>13</sup> C-NMR Spectrum of <b>5</b>                             | ----- | S42 |
| <sup>1</sup> H-NMR Spectrum of <b>6</b>                              | ----- | S43 |
| <sup>13</sup> C-NMR Spectrum of <b>6</b>                             | ----- | S44 |
| <sup>1</sup> H-NMR Spectrum of <b>7</b>                              | ----- | S45 |
| <sup>13</sup> C-NMR Spectrum of <b>7</b>                             | ----- | S46 |
| <sup>1</sup> H-NMR Spectrum of <b>8</b>                              | ----- | S47 |
| <sup>13</sup> C-NMR Spectrum of <b>8</b>                             | ----- | S48 |
| <b>Fig. S1</b> Atom types and atom charges of the modified base      | ----- | S49 |
| <b>Table S1</b> Bond, angle and dihedral added for the modified base | ----- | S49 |
| <b>Fig. S2</b> RMS deviations during the MD simulation               | ----- | S50 |

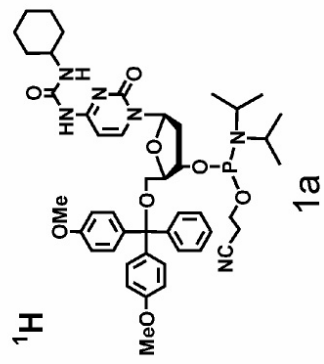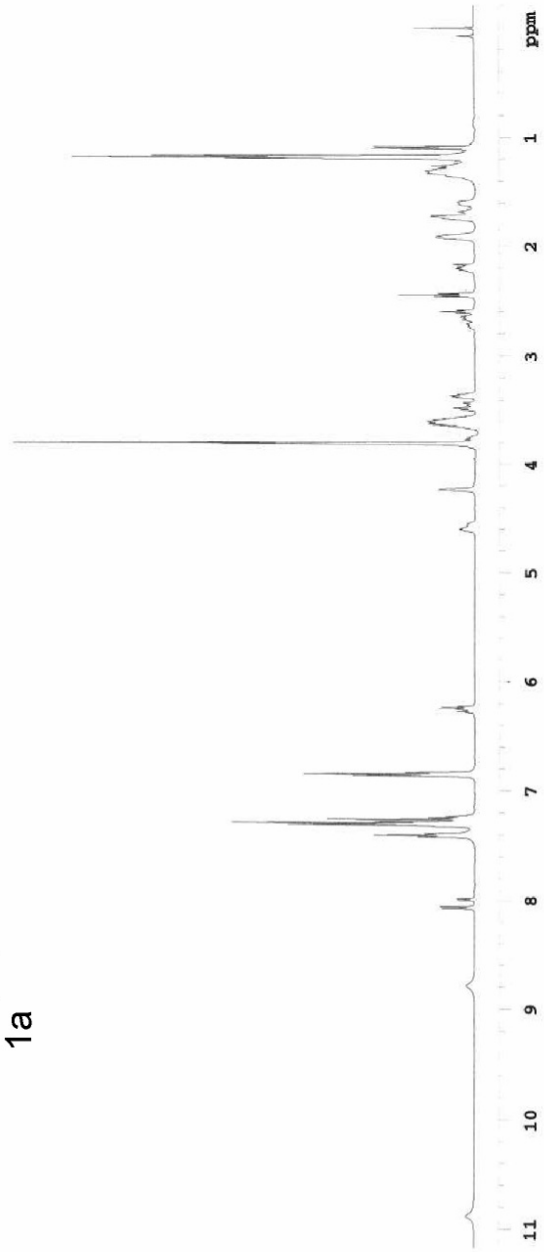

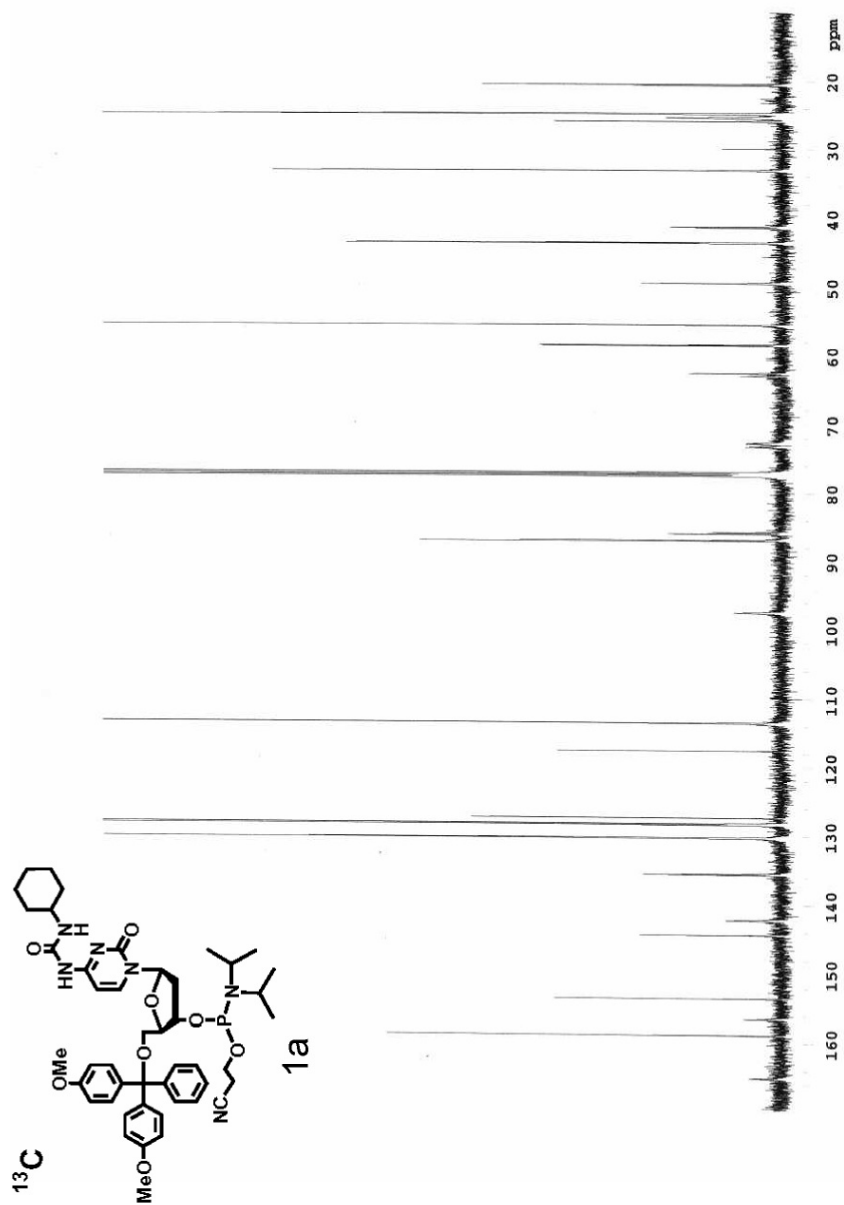

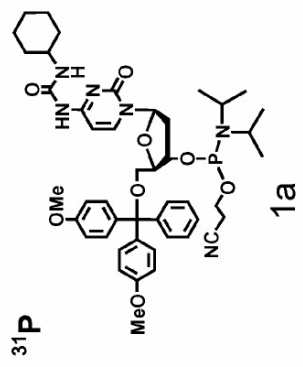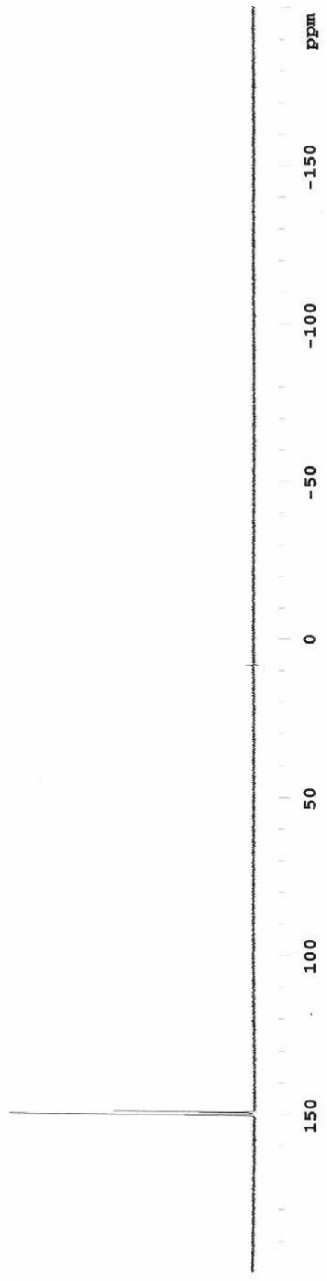

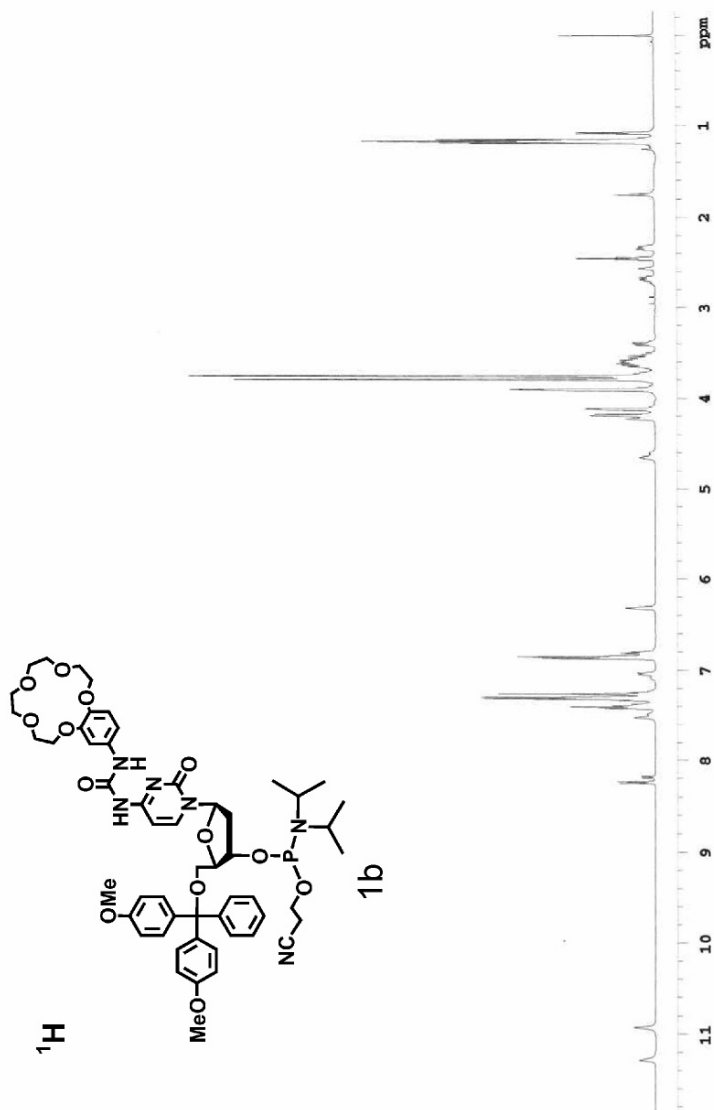

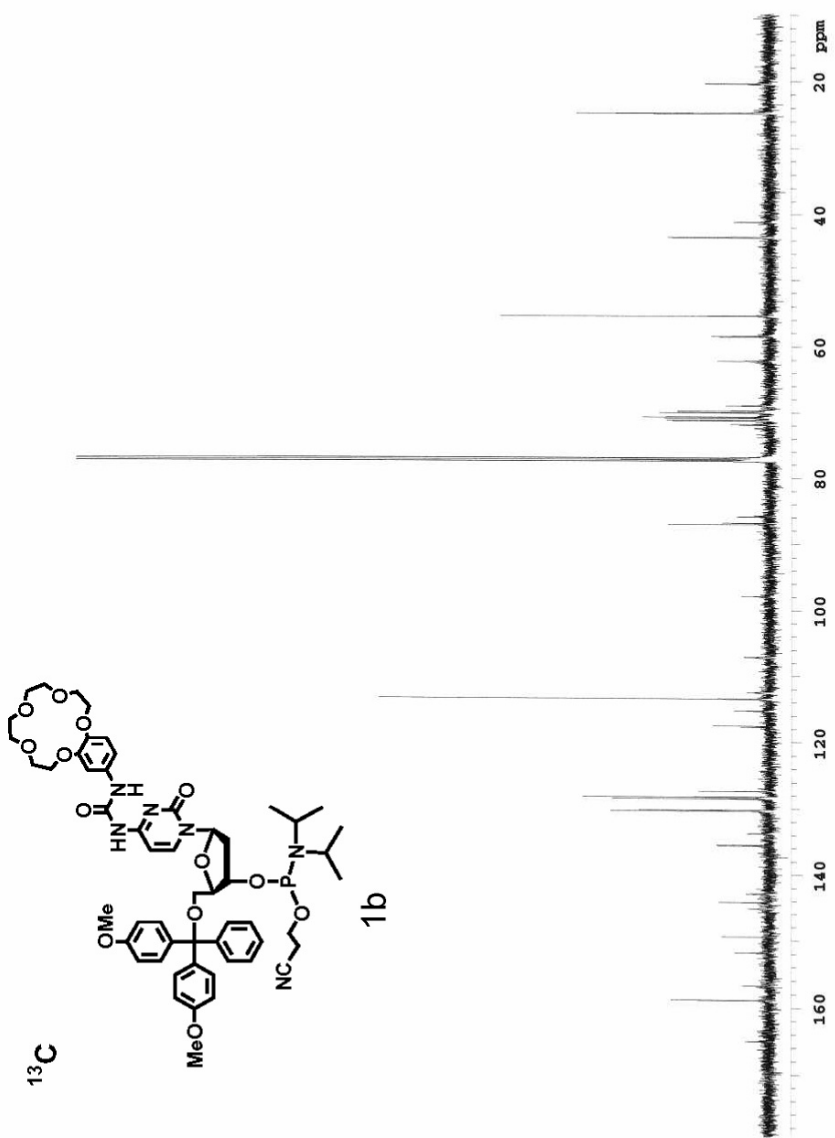

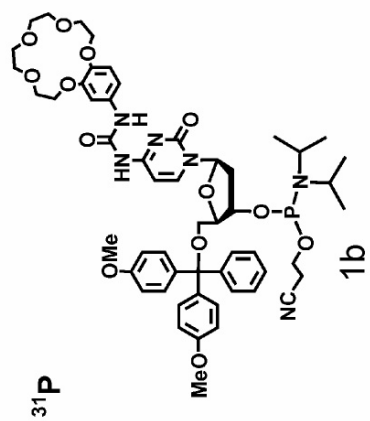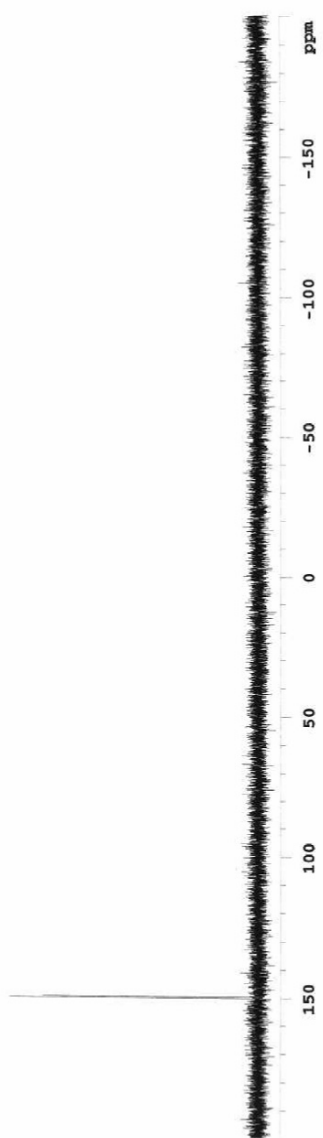



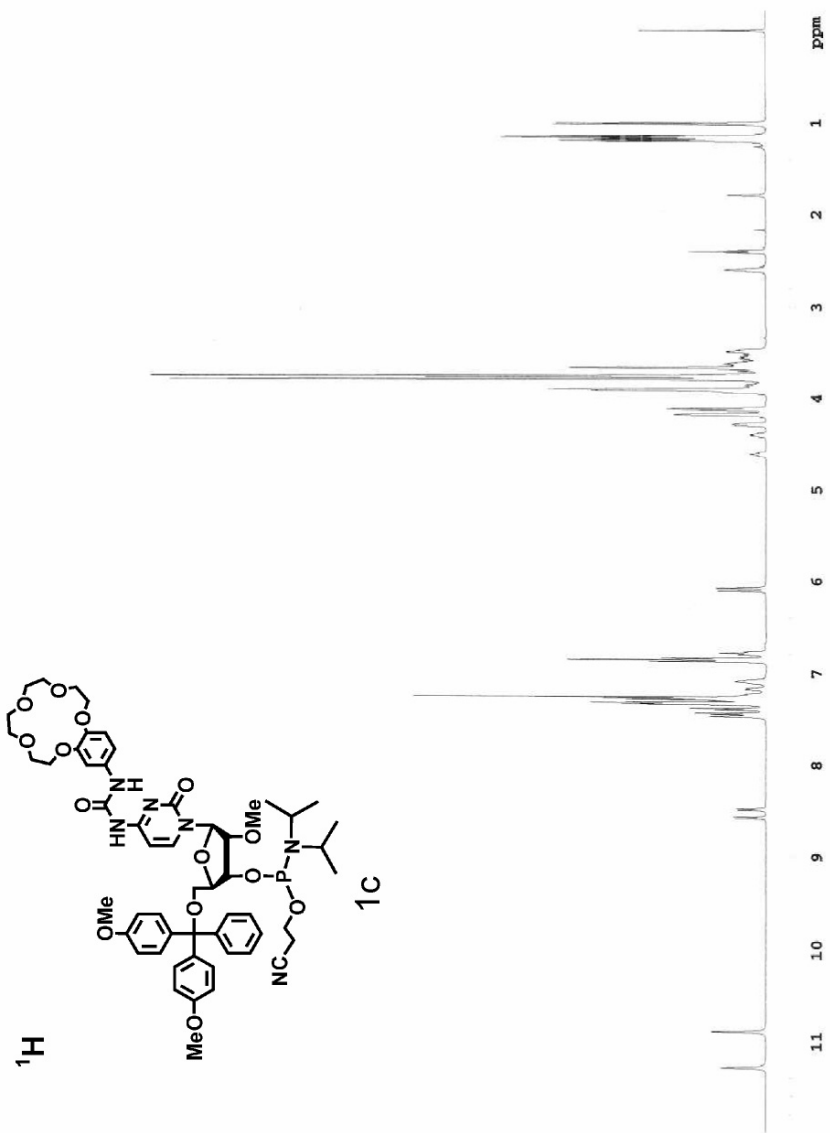

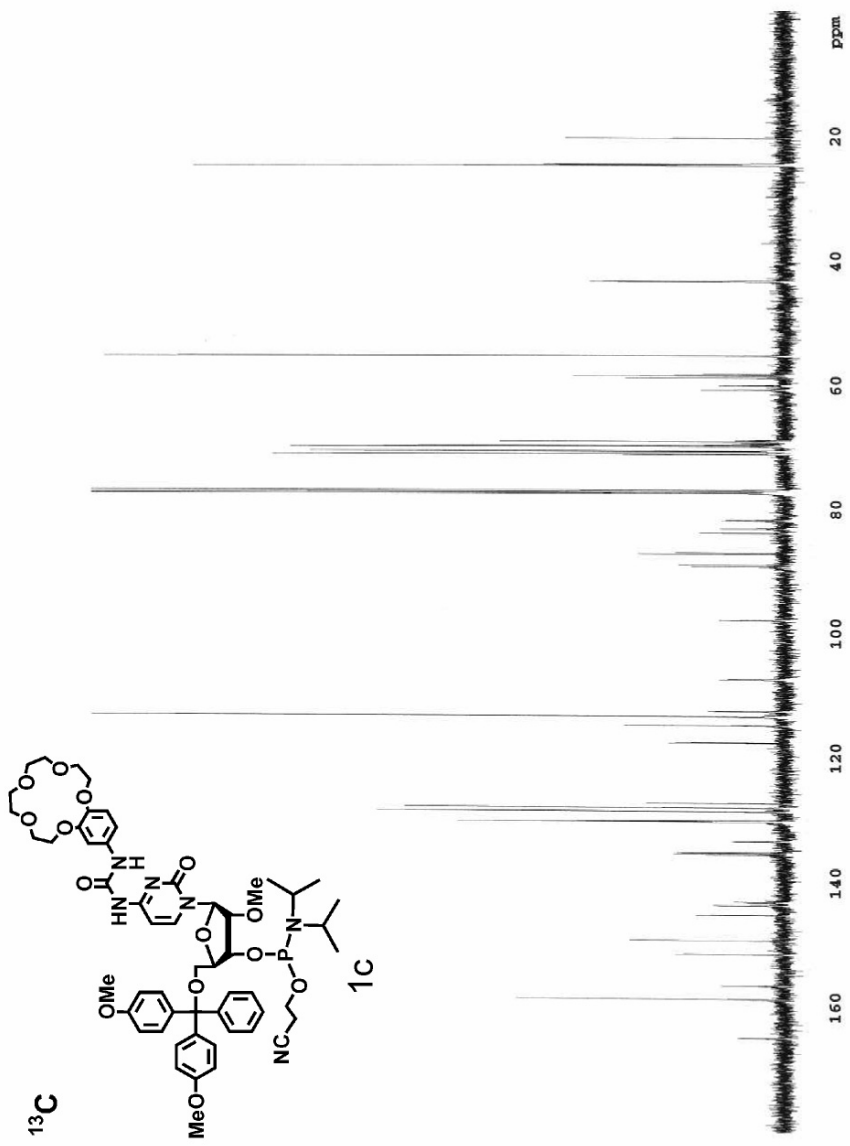

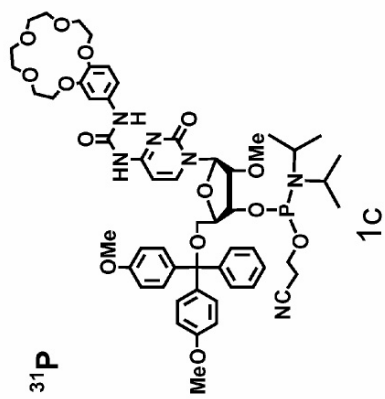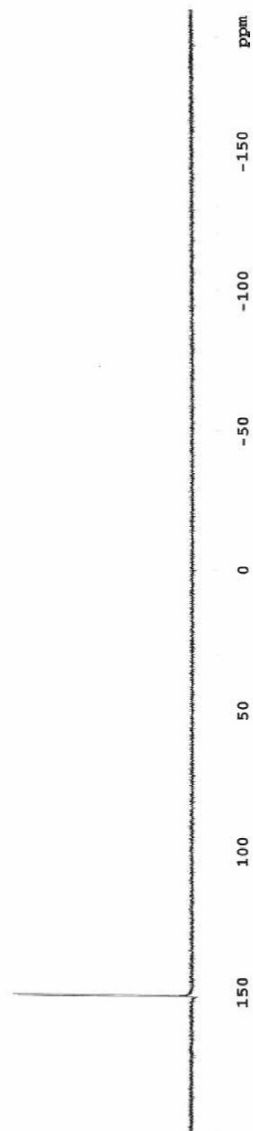

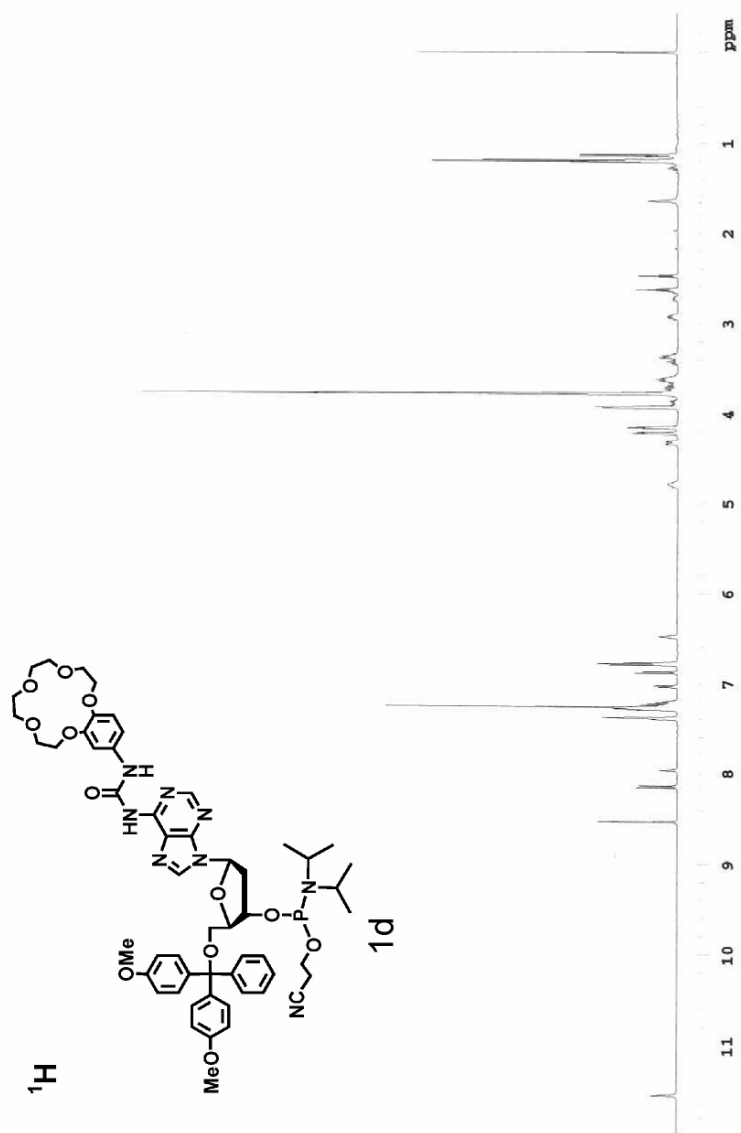

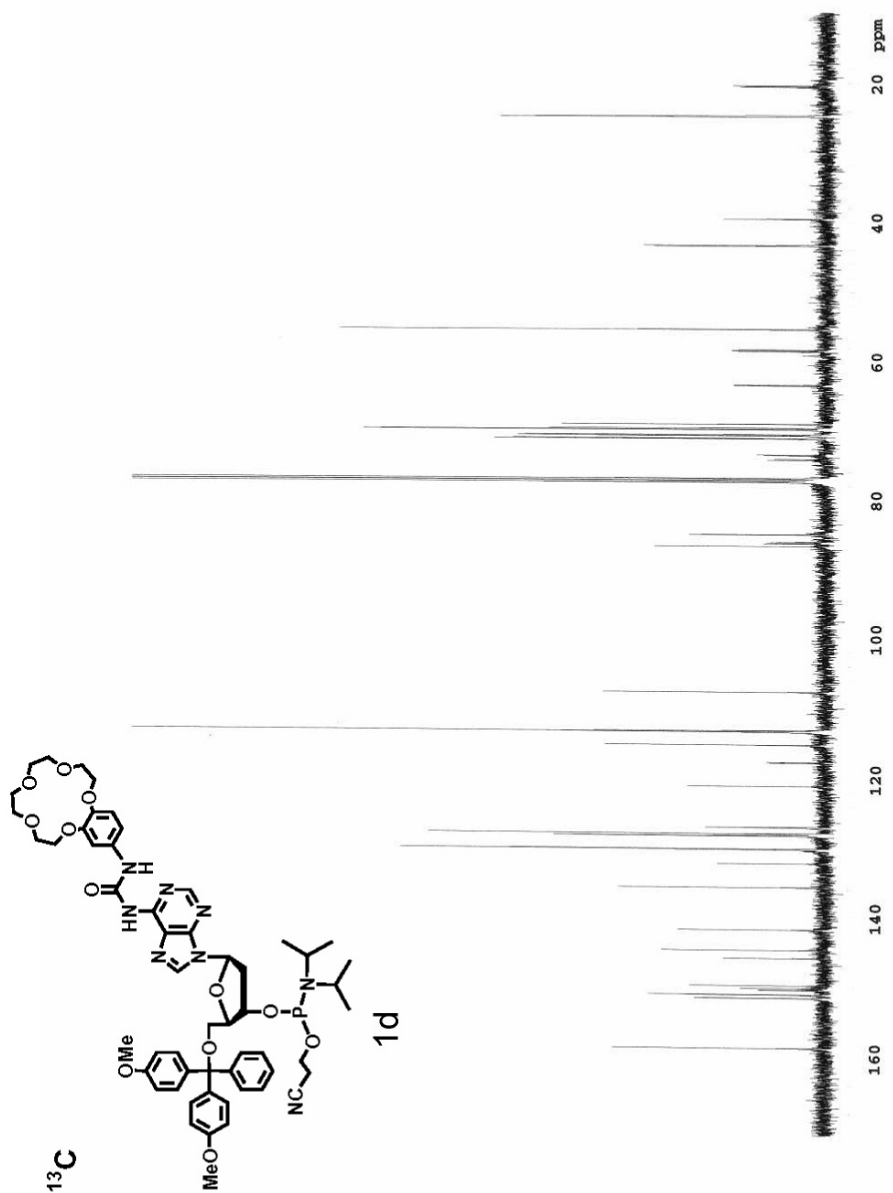

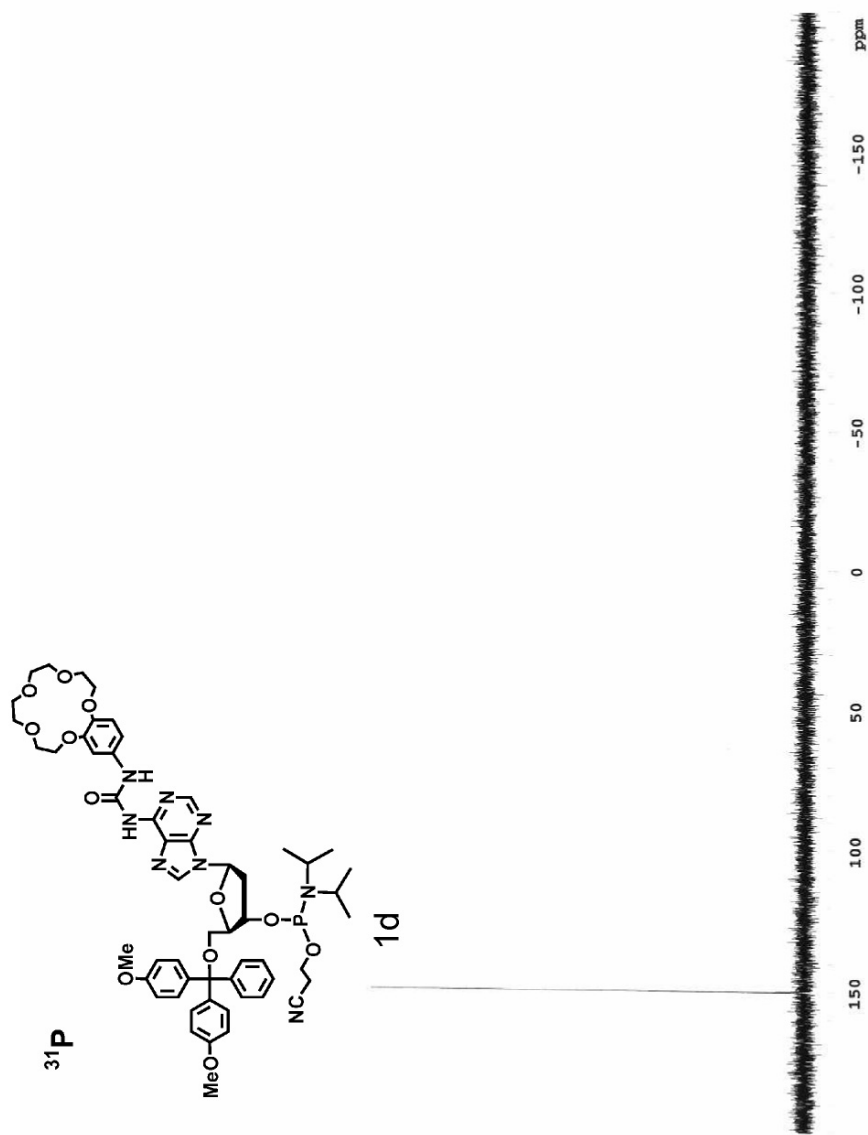

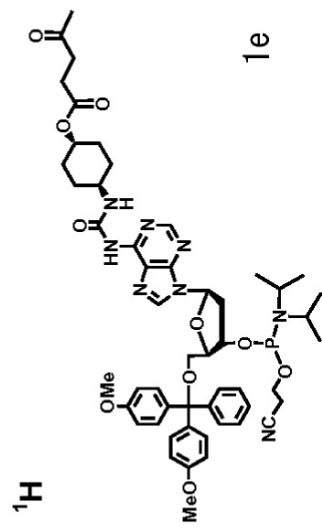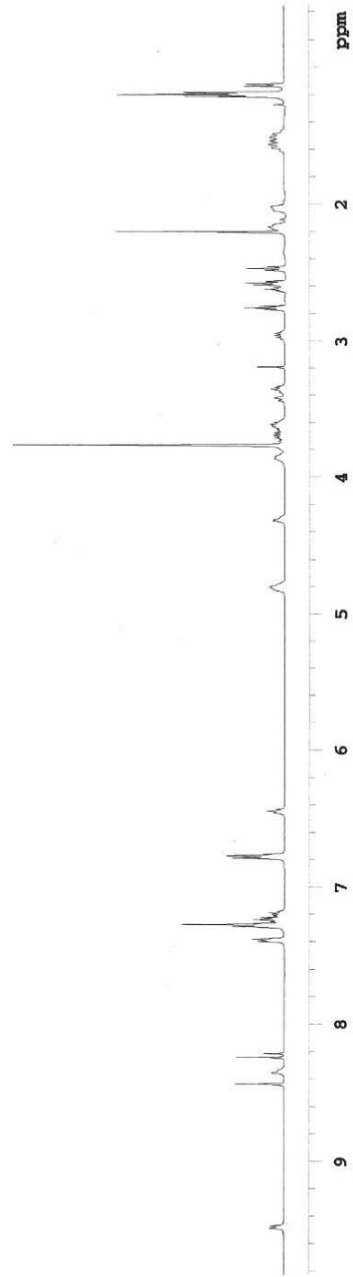

<sup>13</sup>C

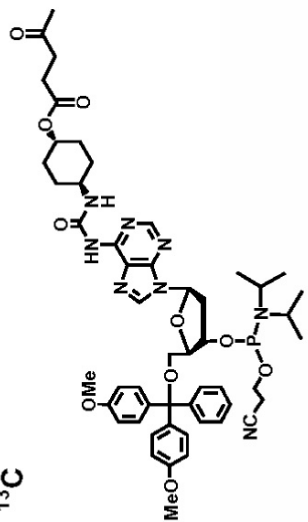

1e

ppm

20

40

60

80

100

120

140

160

180

200



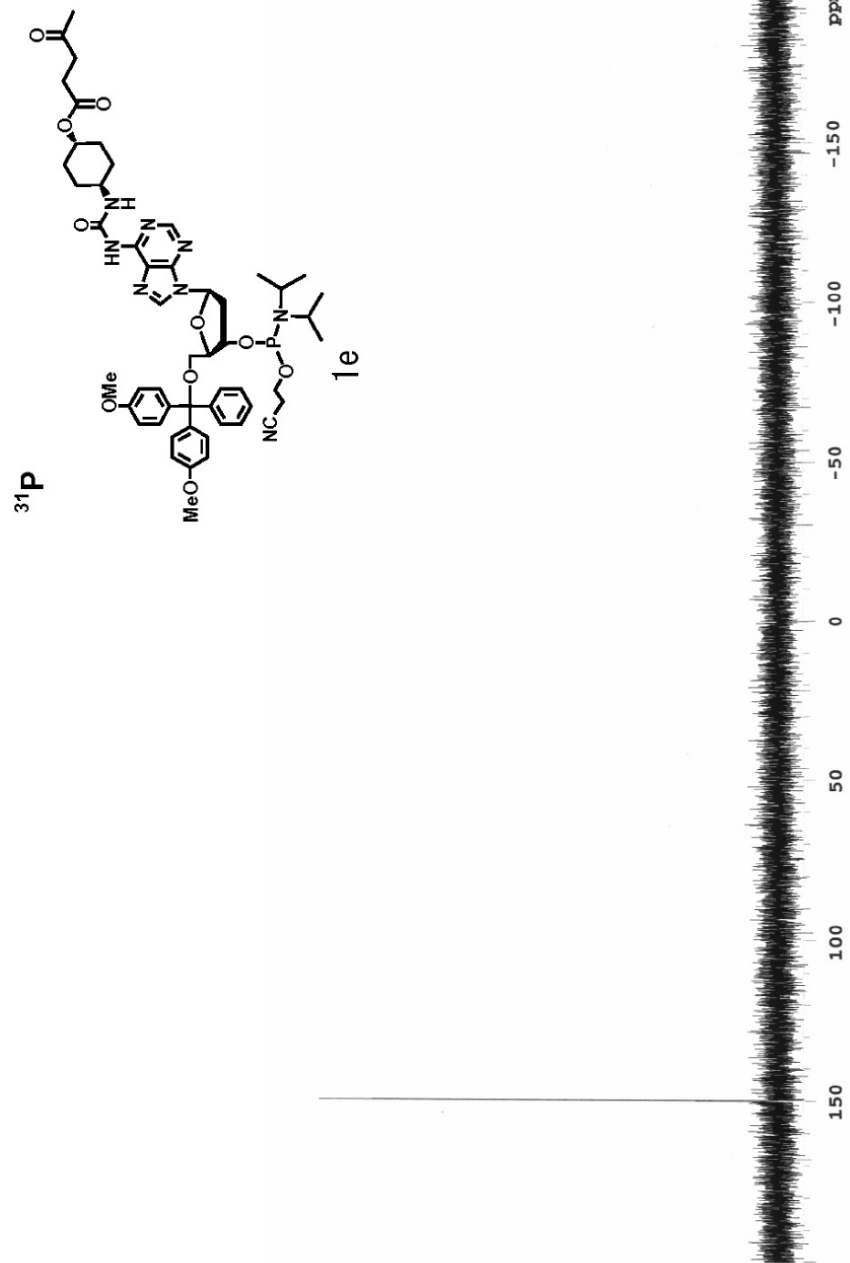

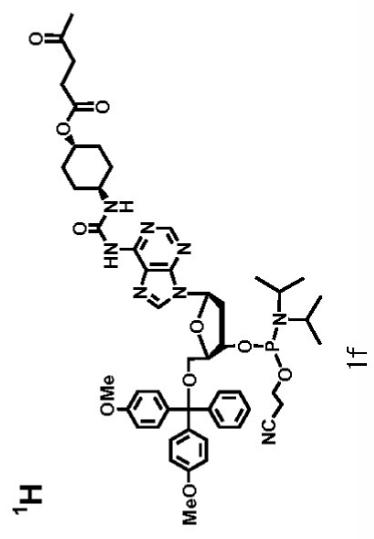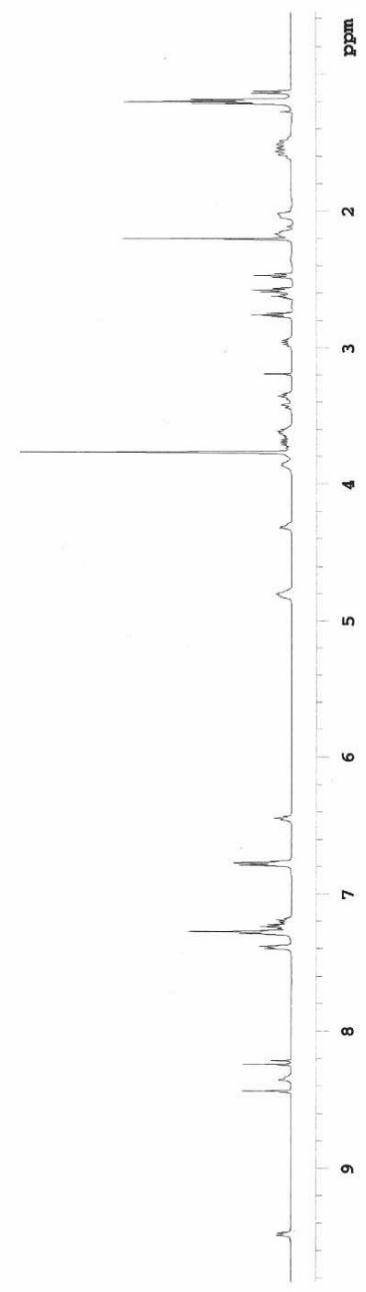

<sup>13</sup>C

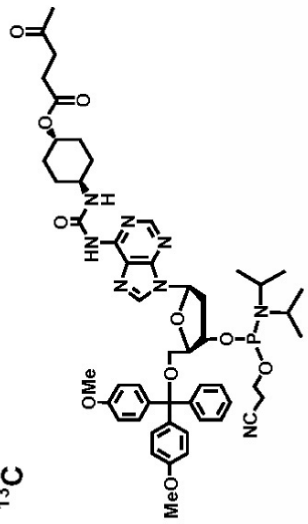

1f

ppm

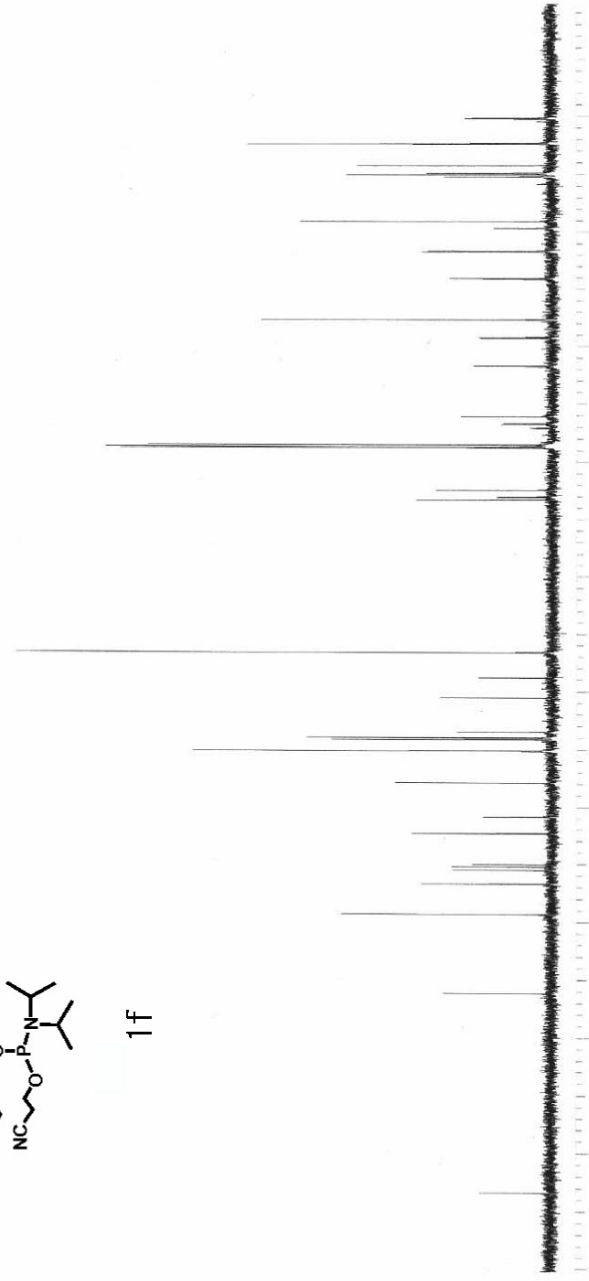

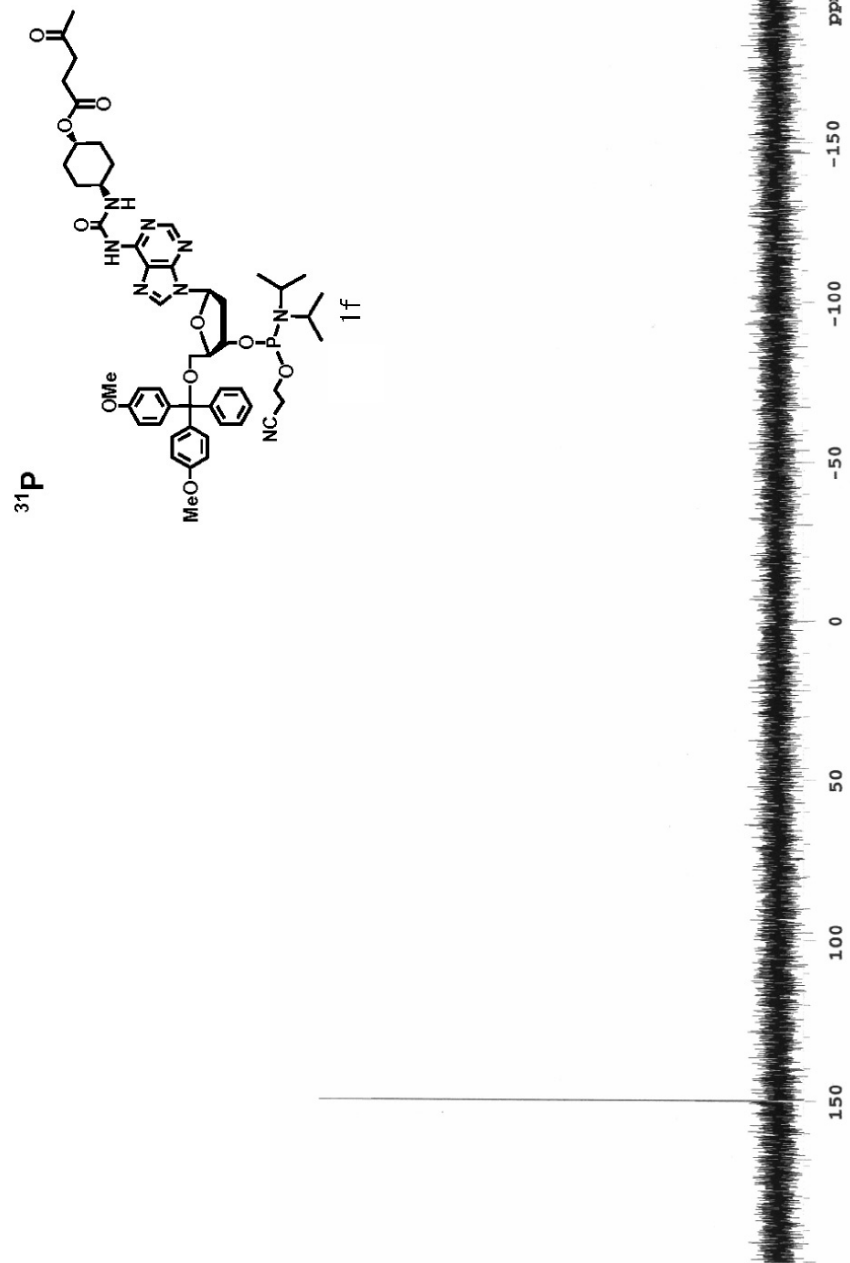

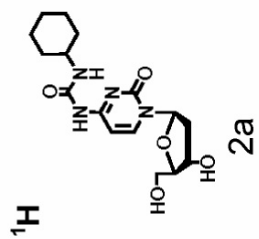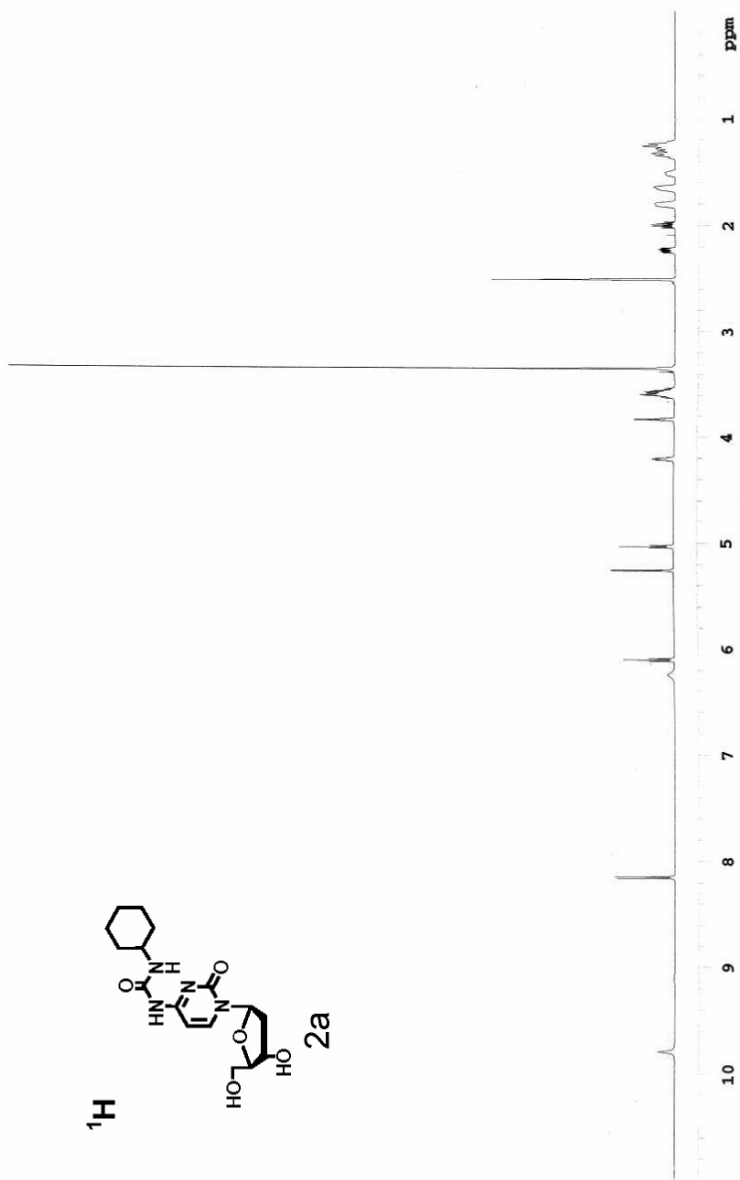

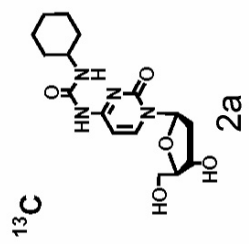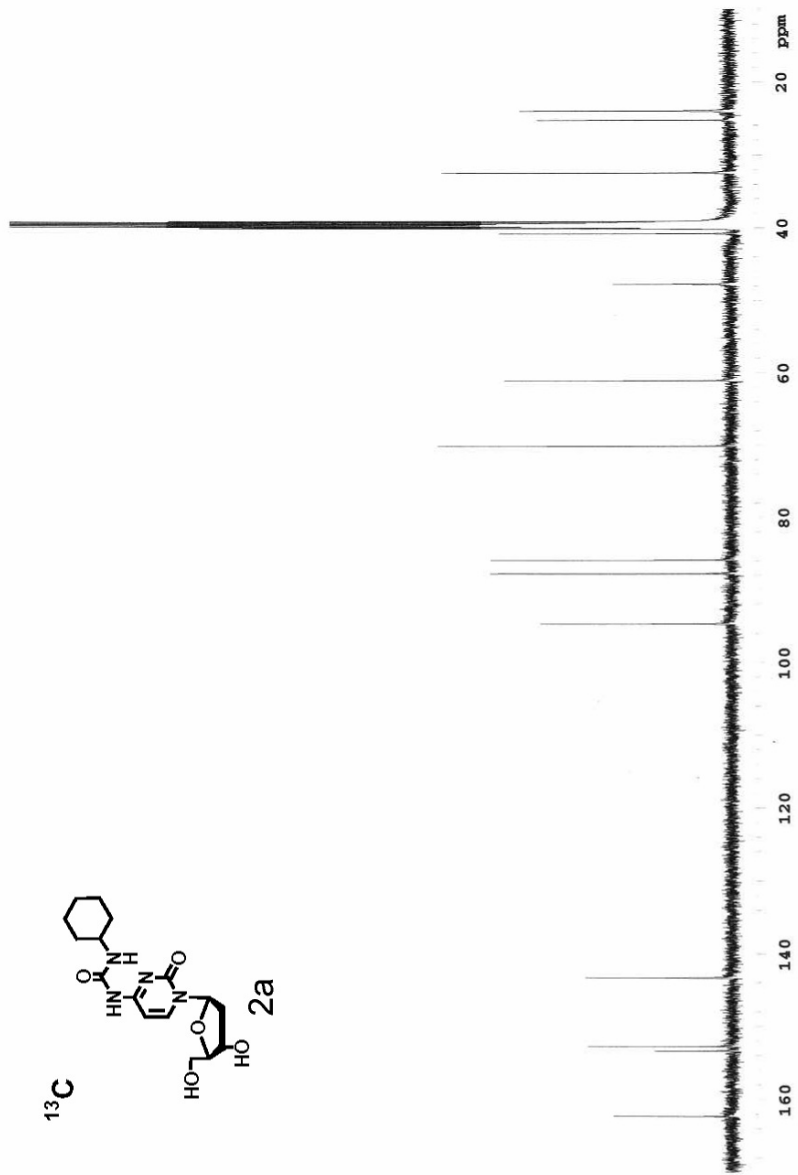

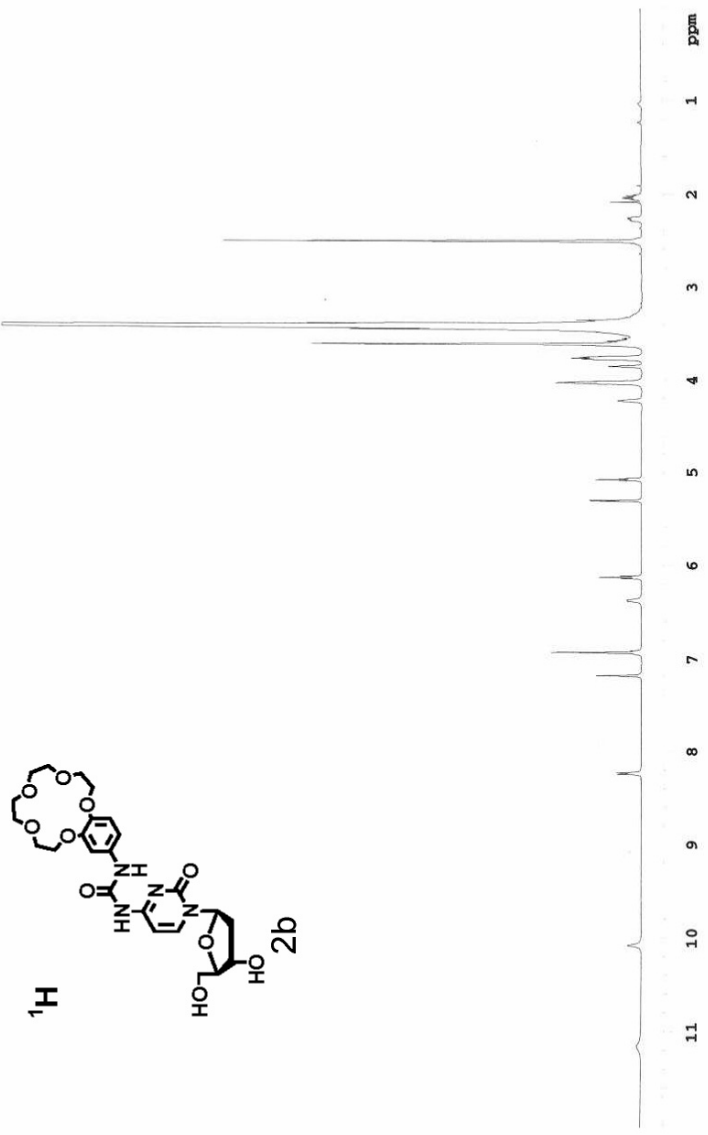

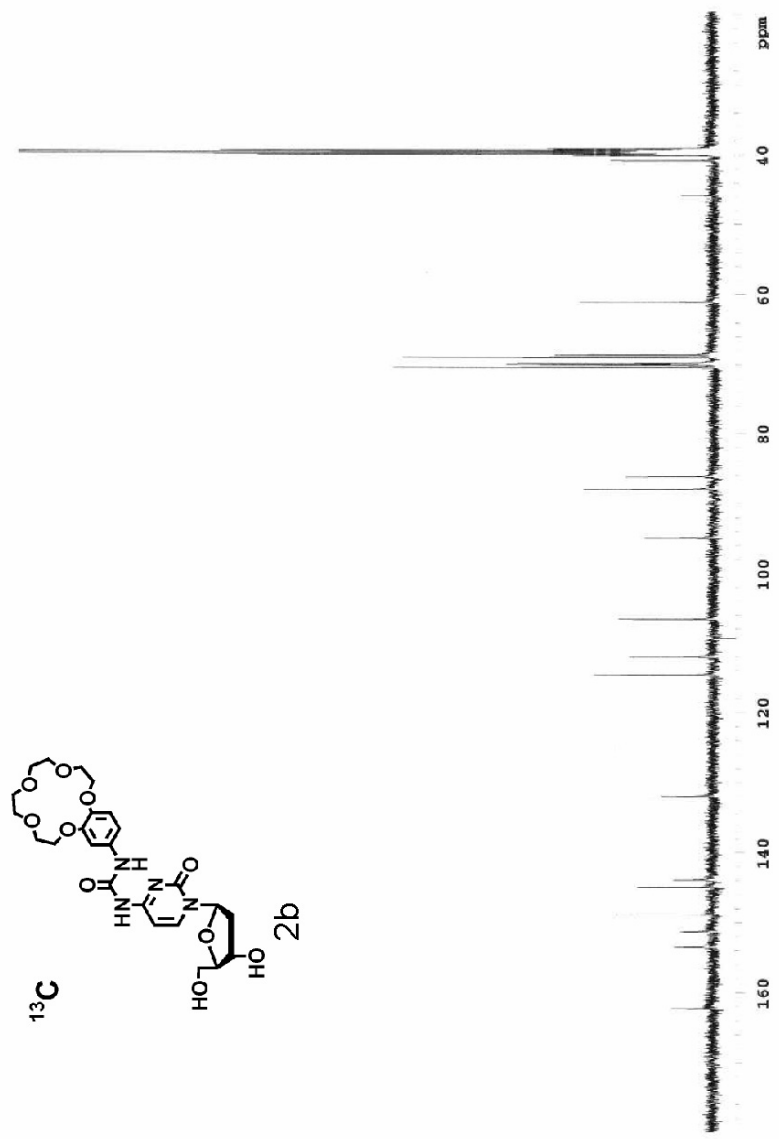



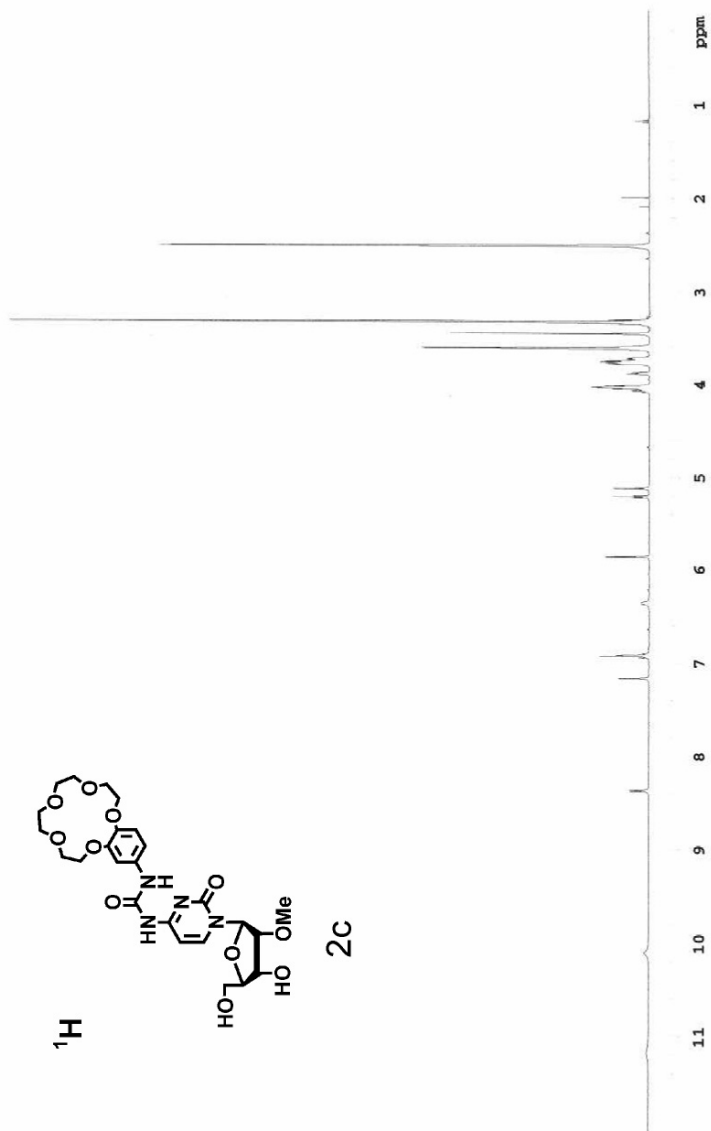

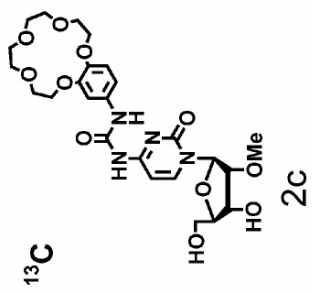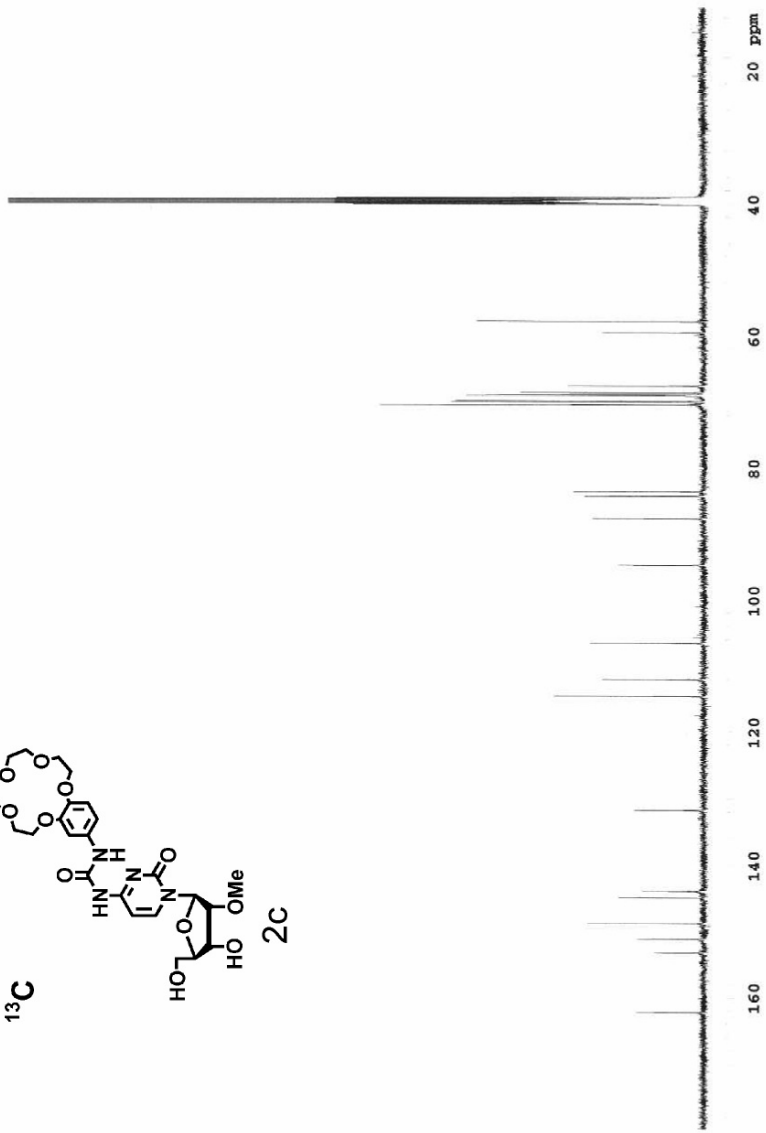

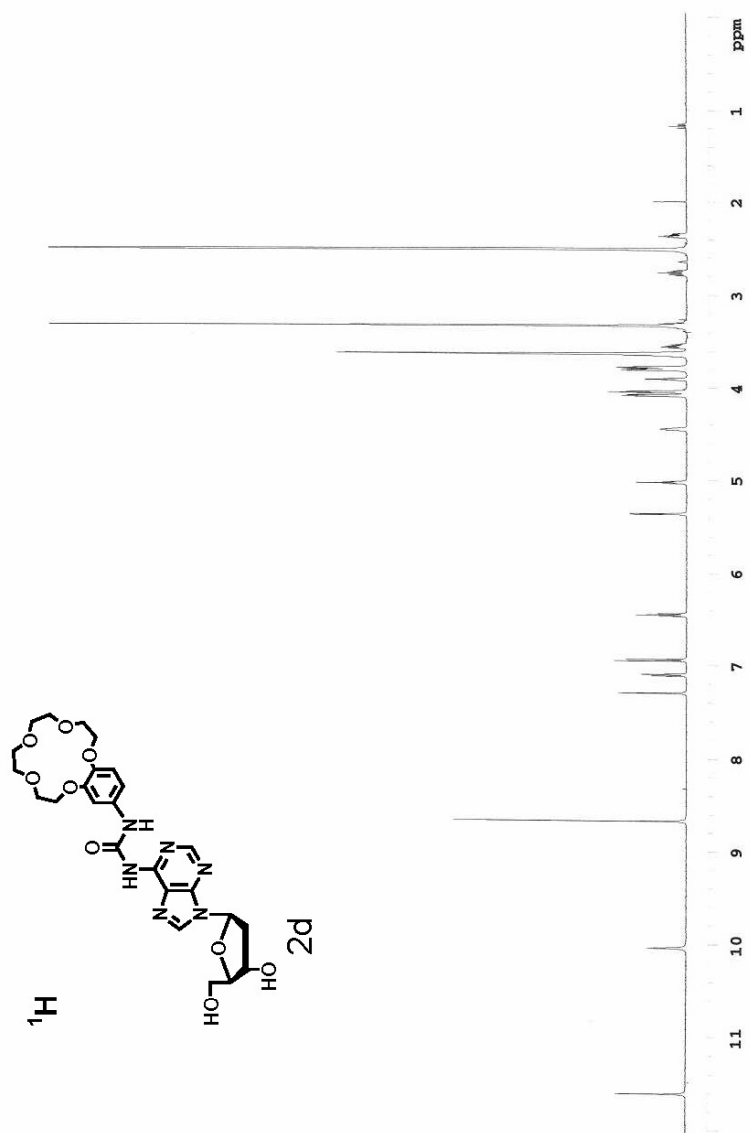

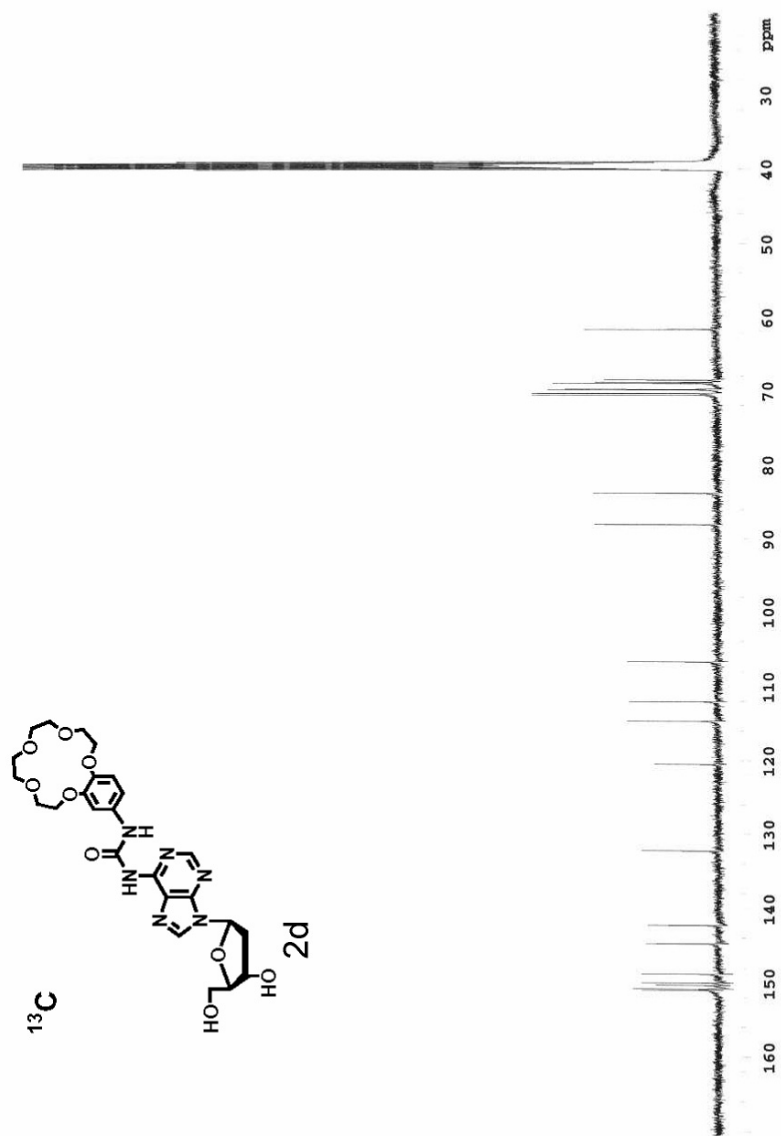

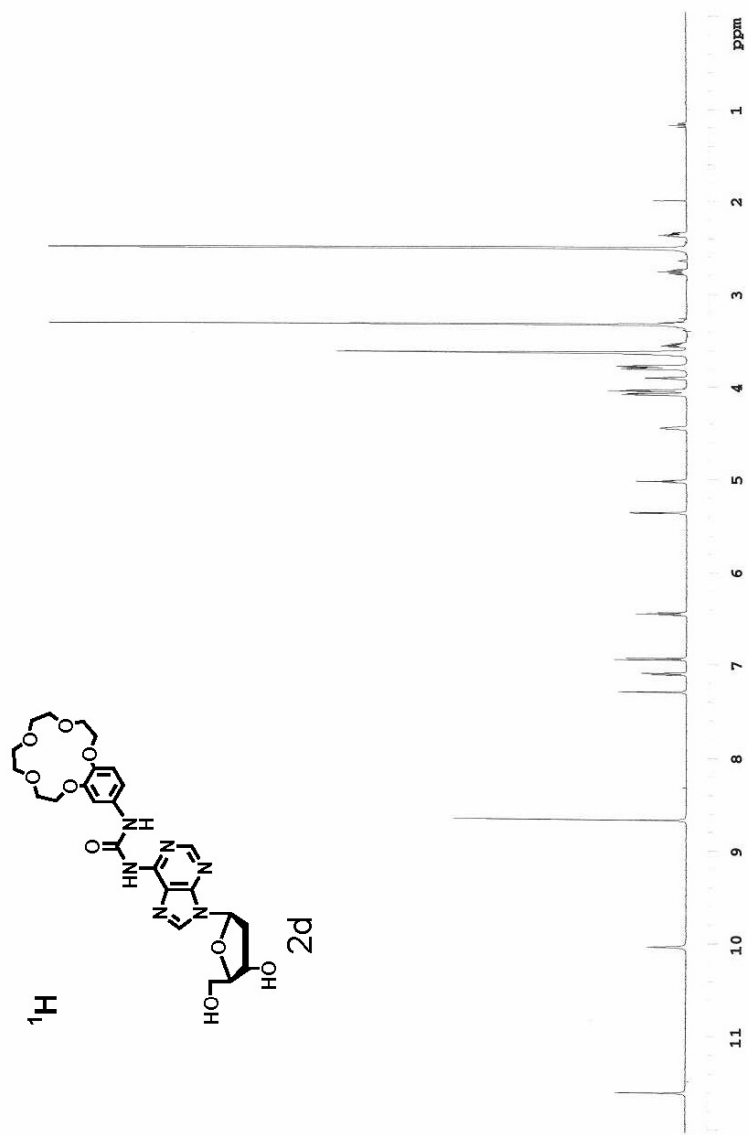

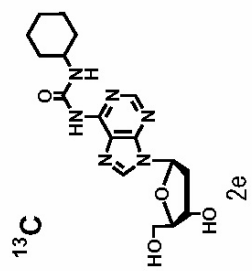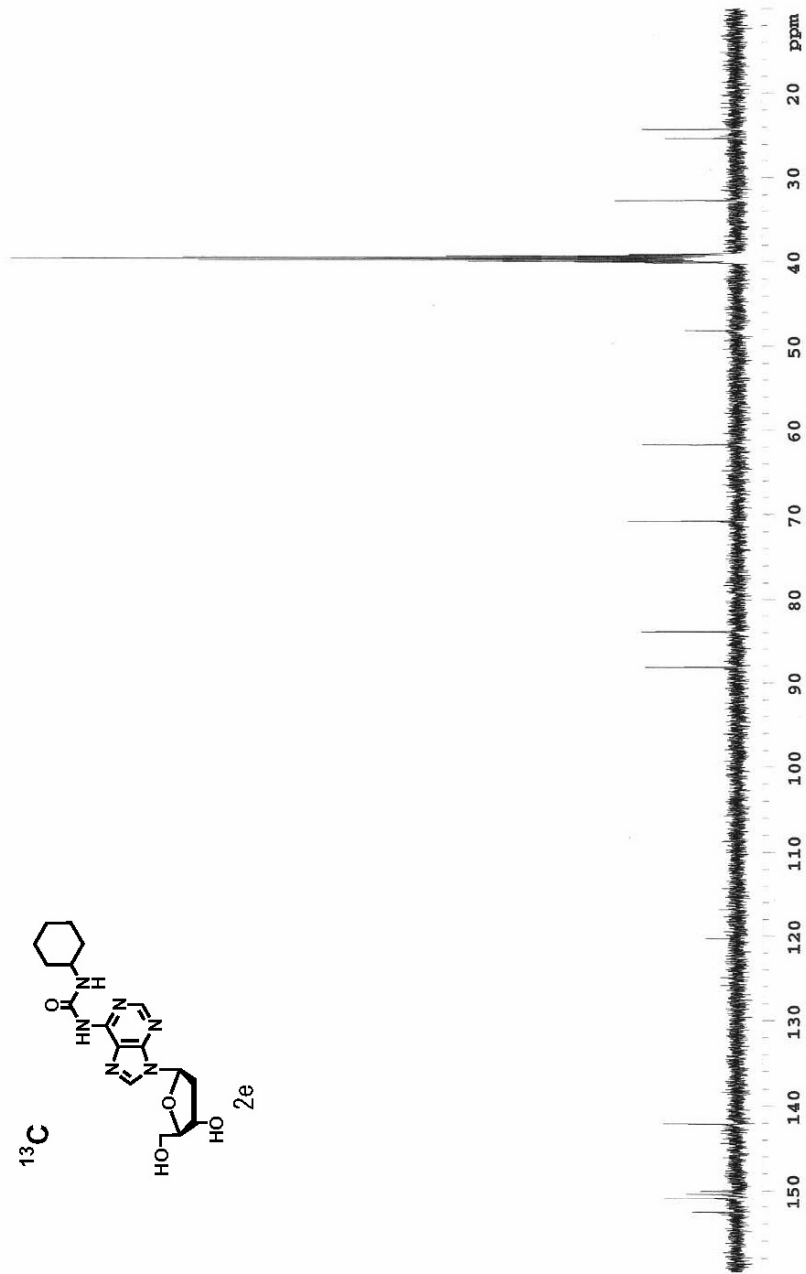

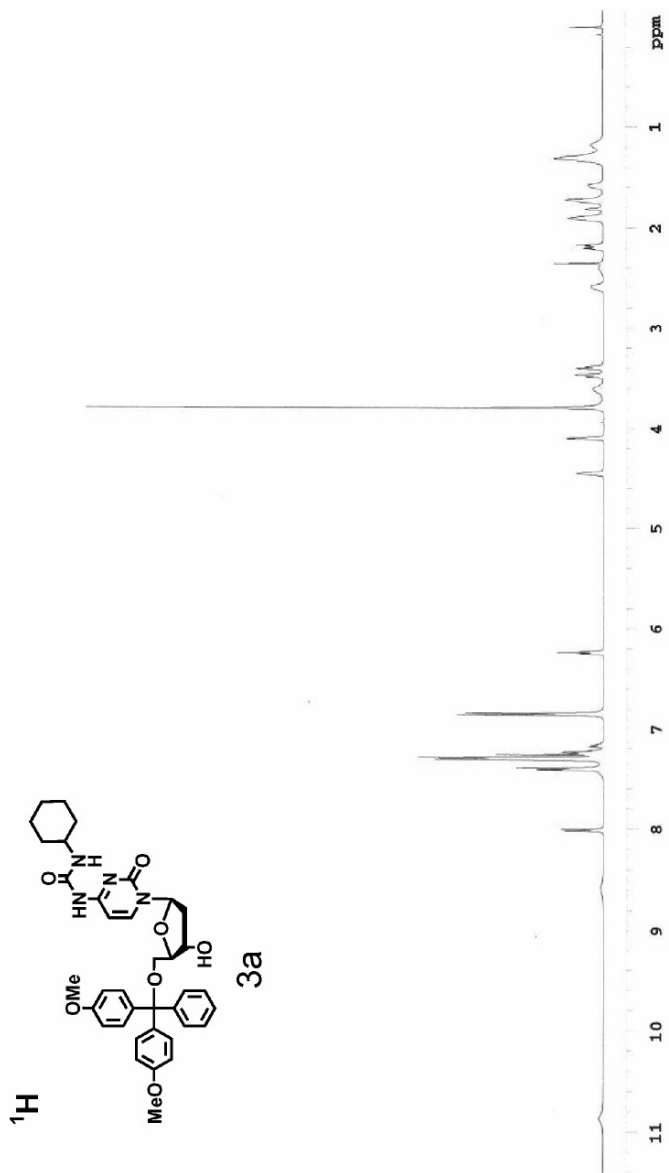

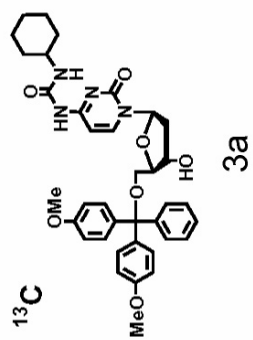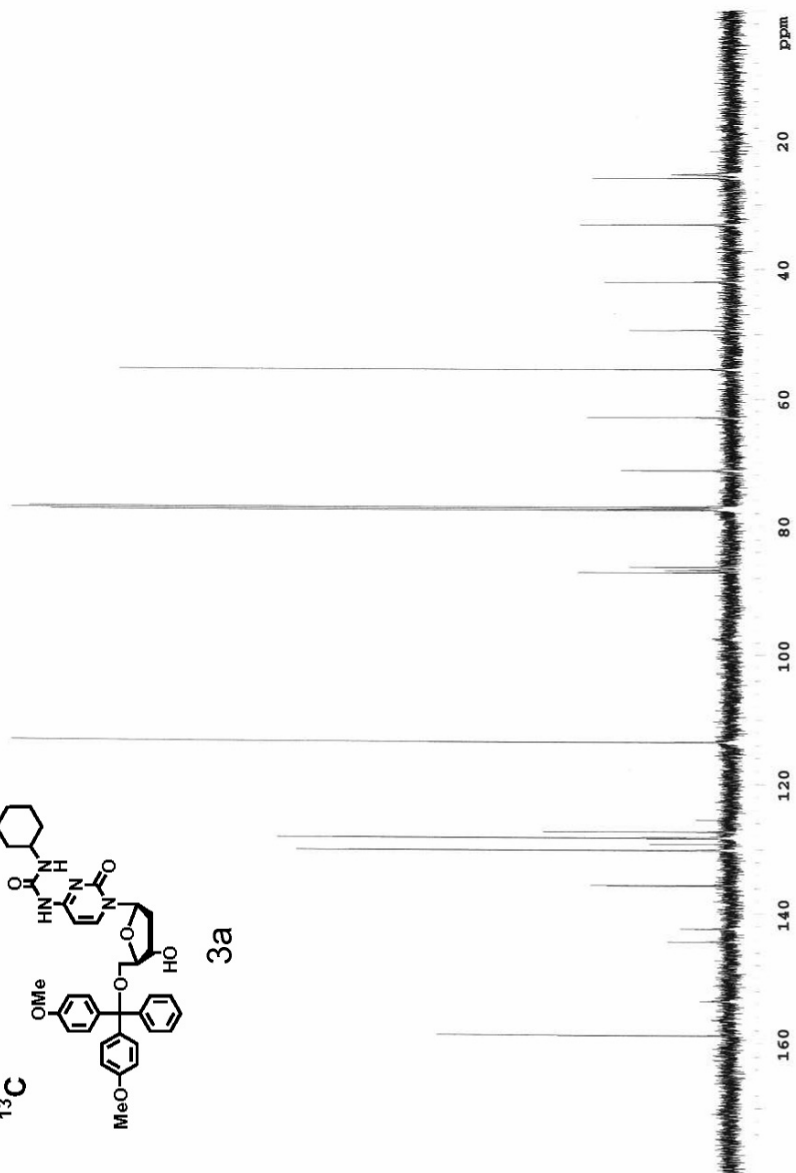



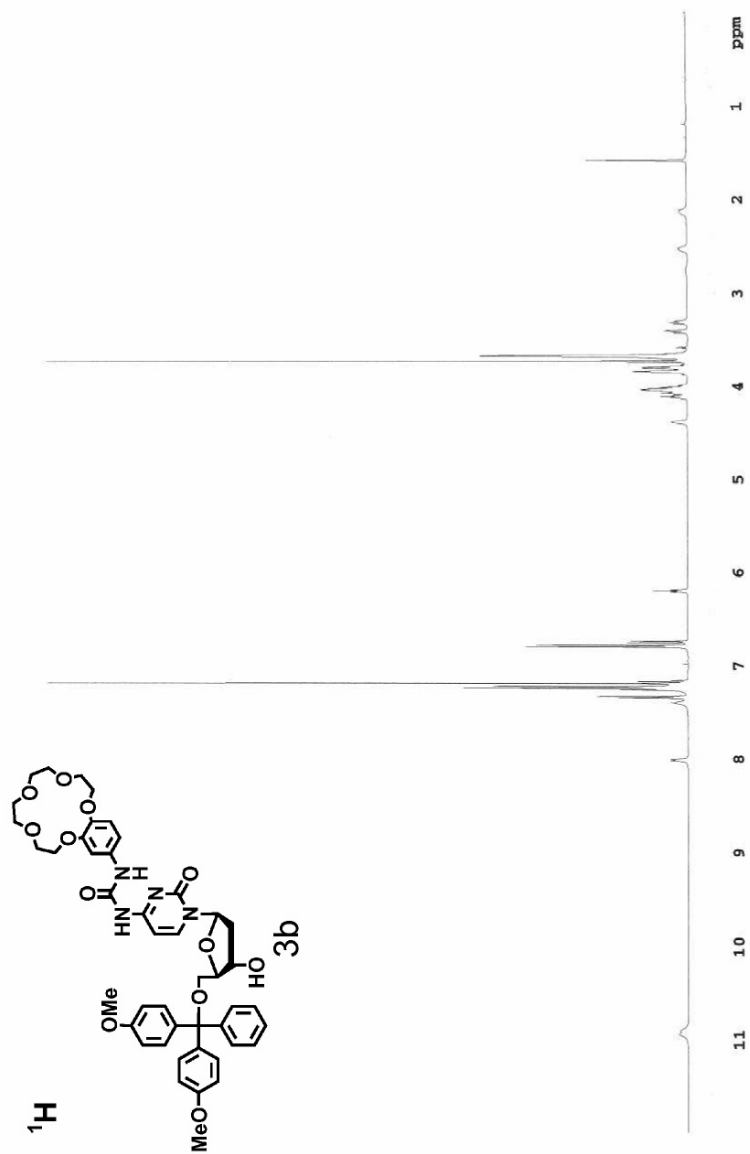

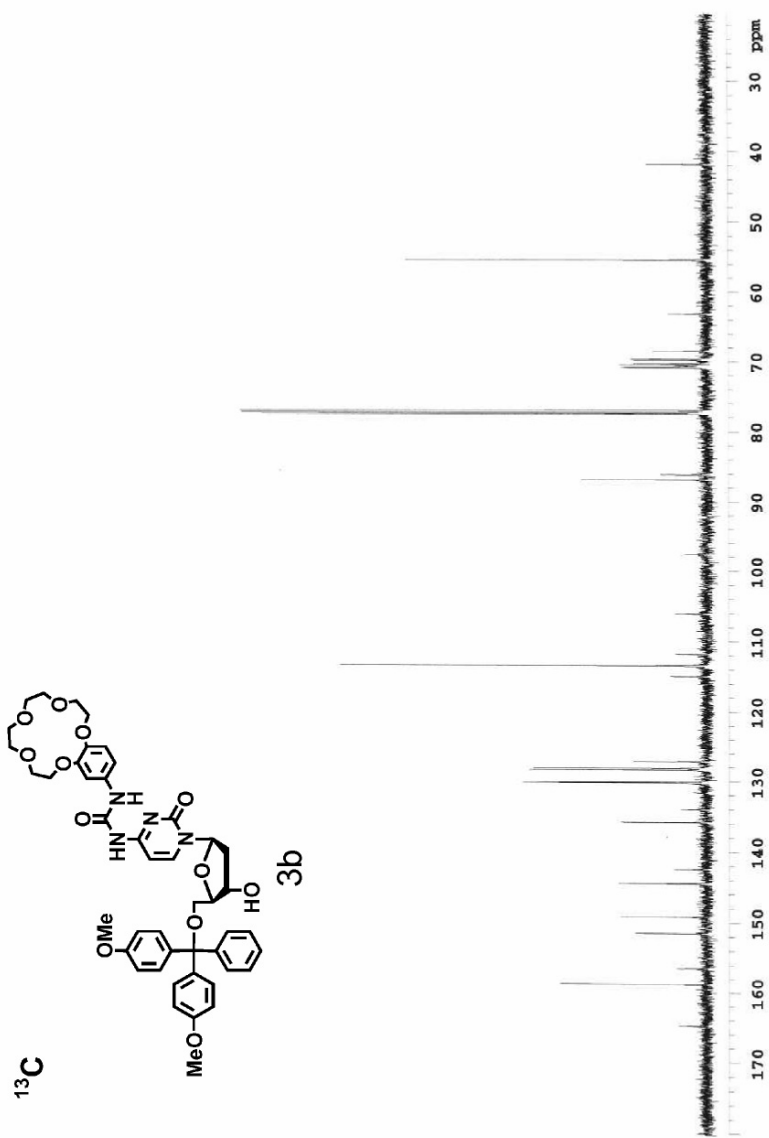

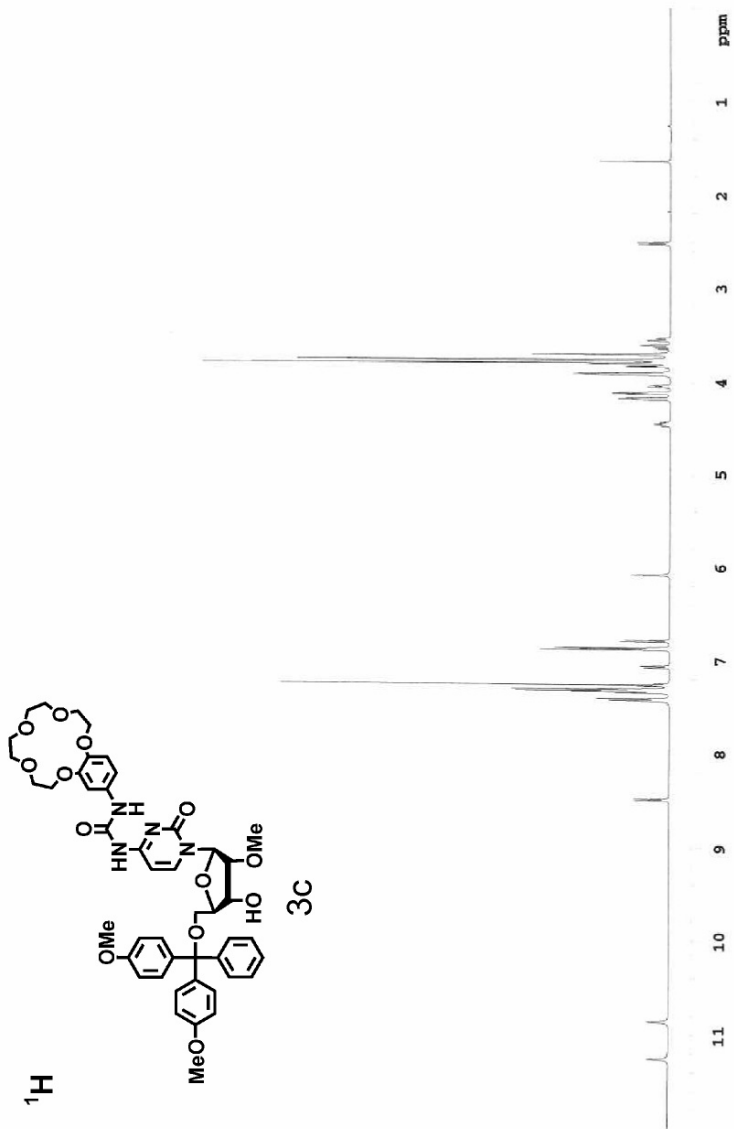

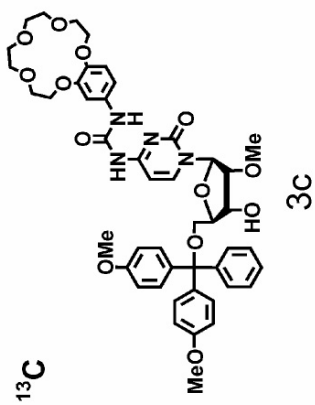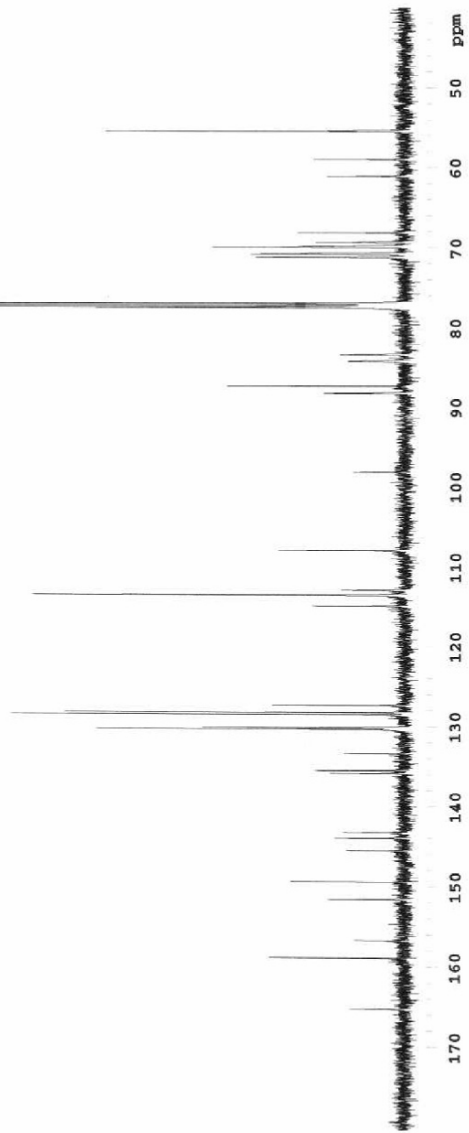

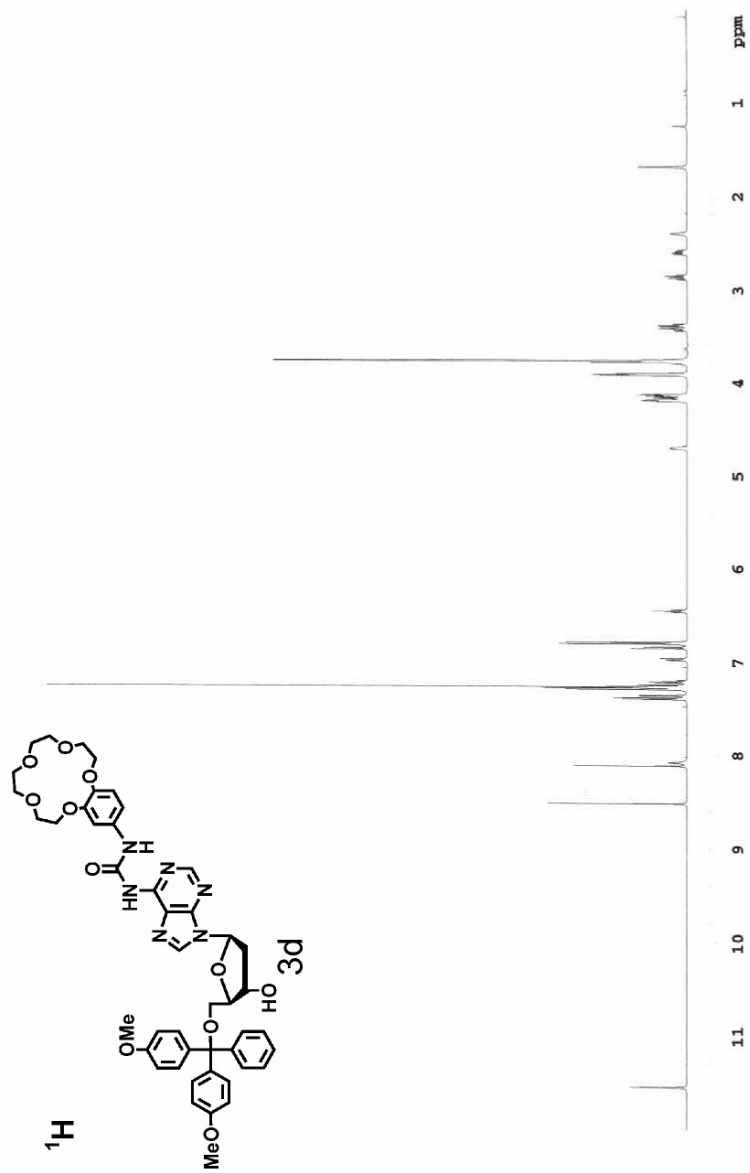

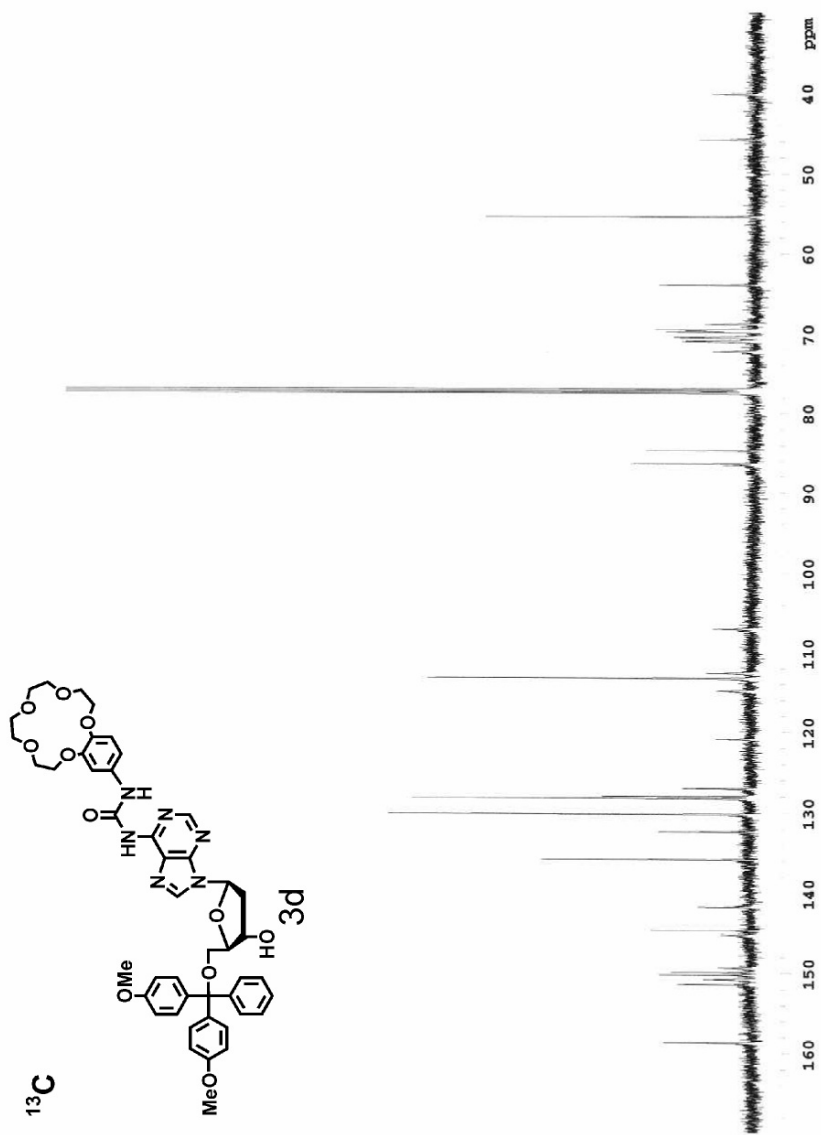

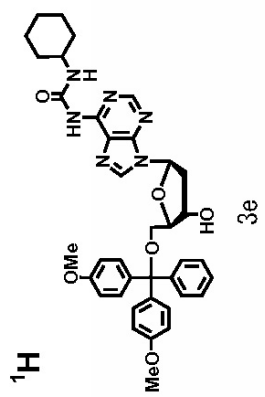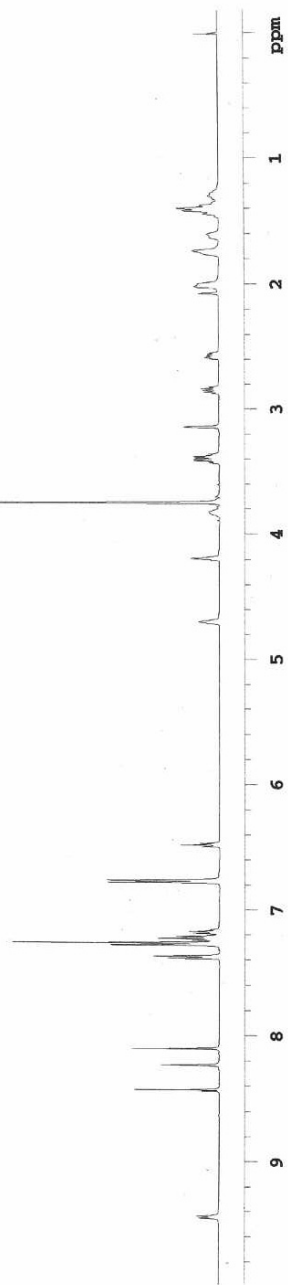

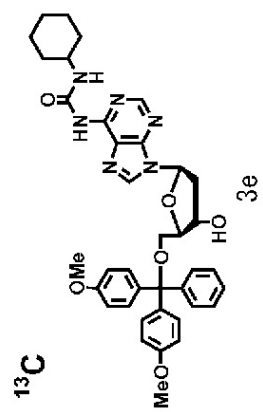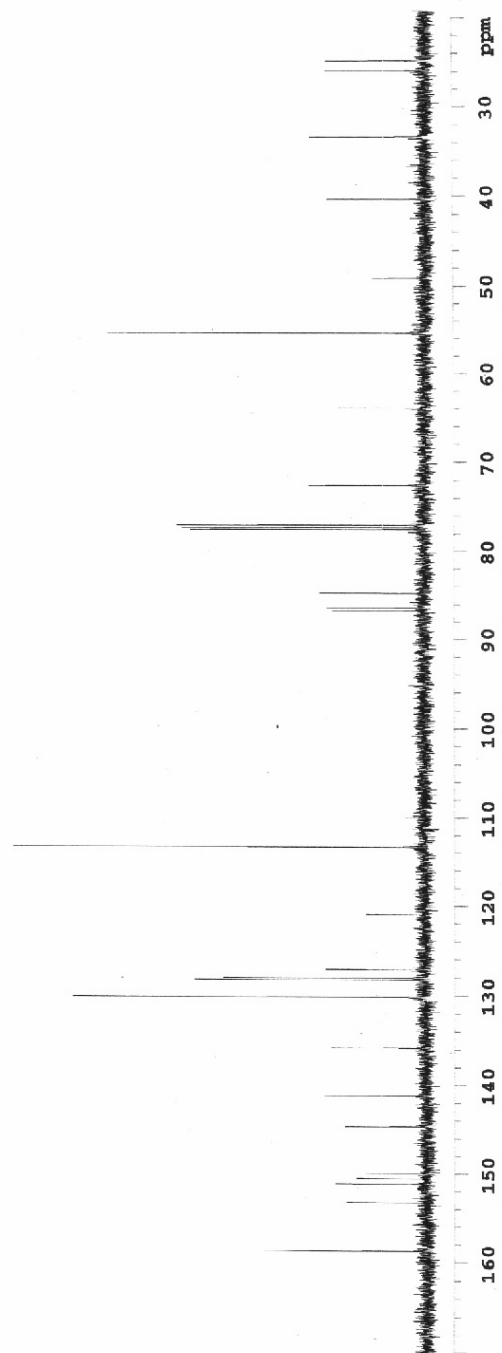



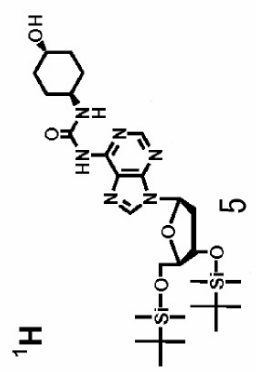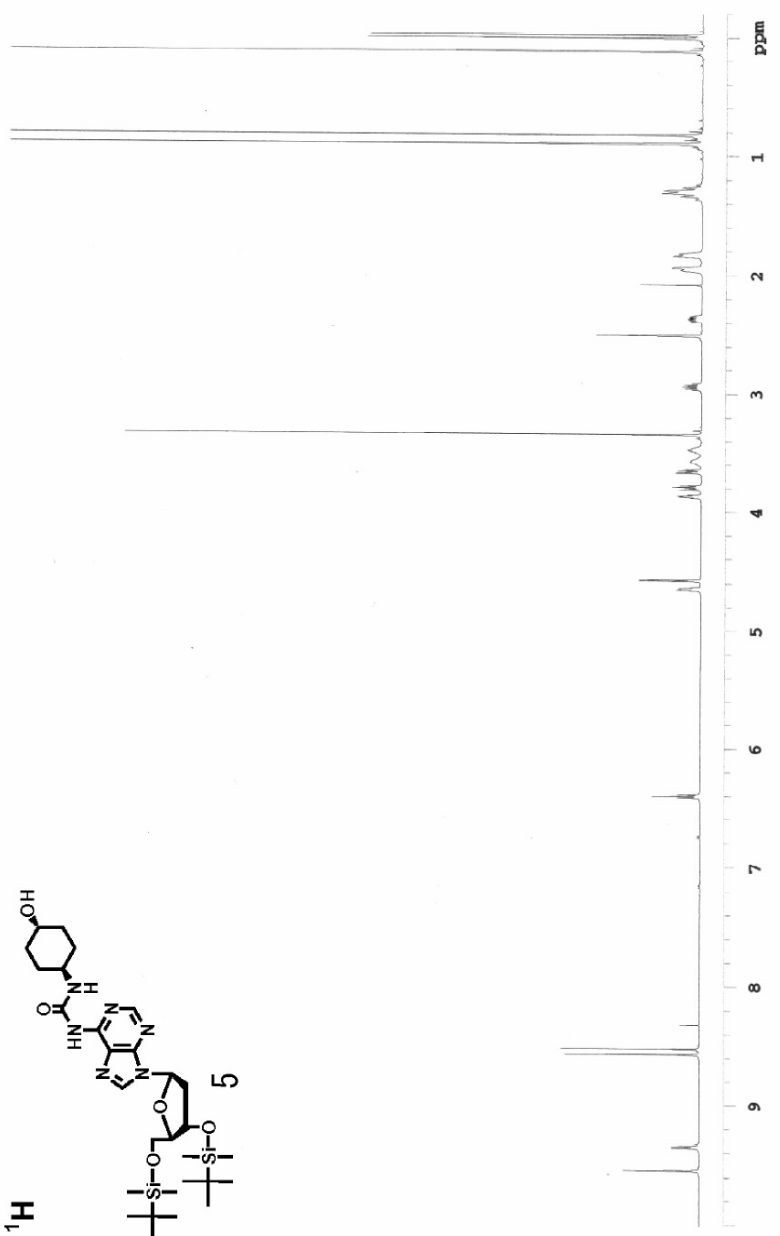

<sup>13</sup>C

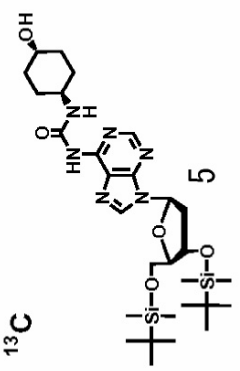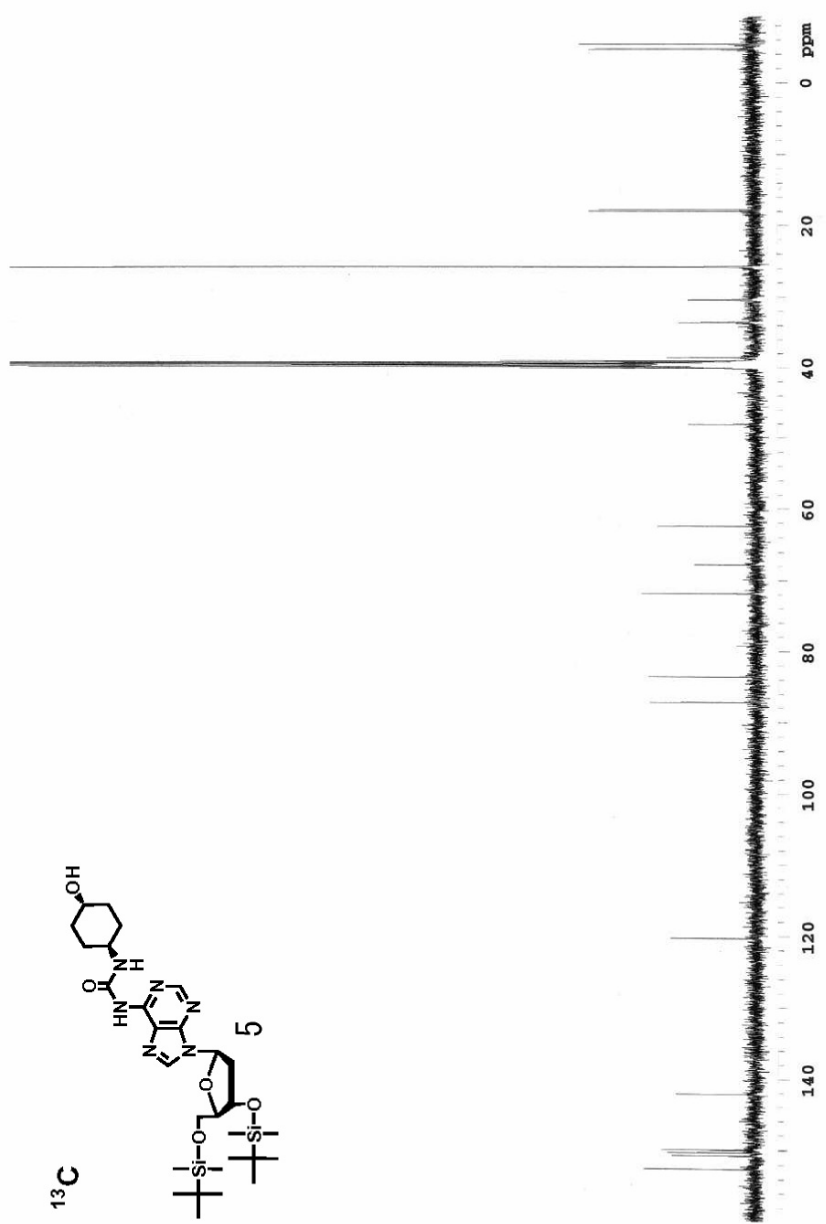

<sup>1</sup>H

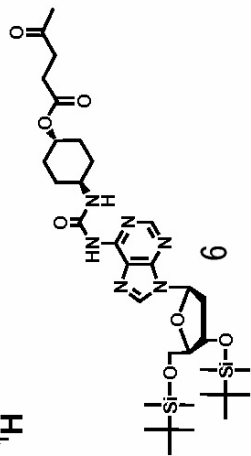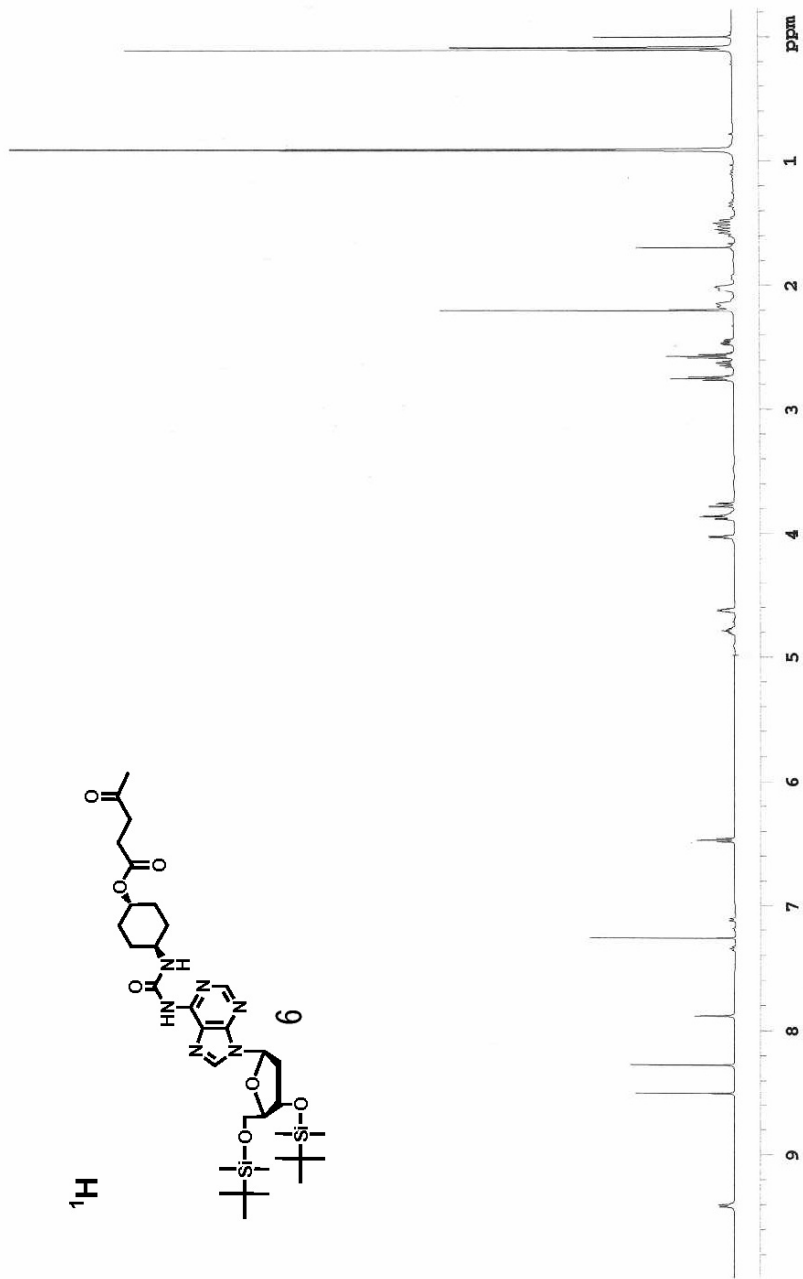

<sup>13</sup>C

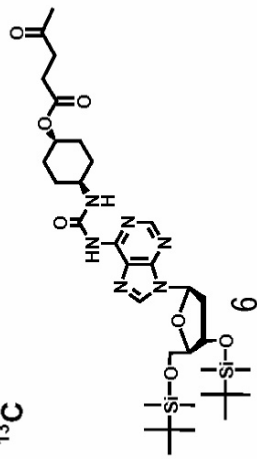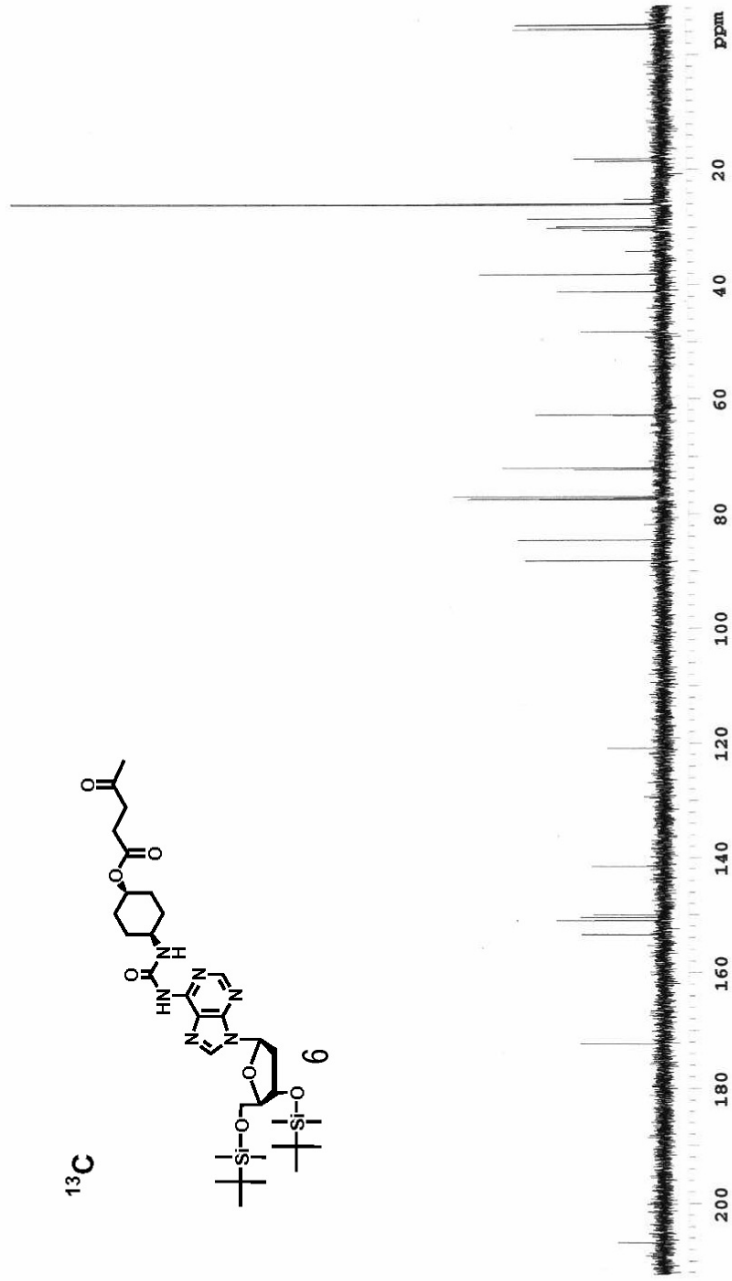

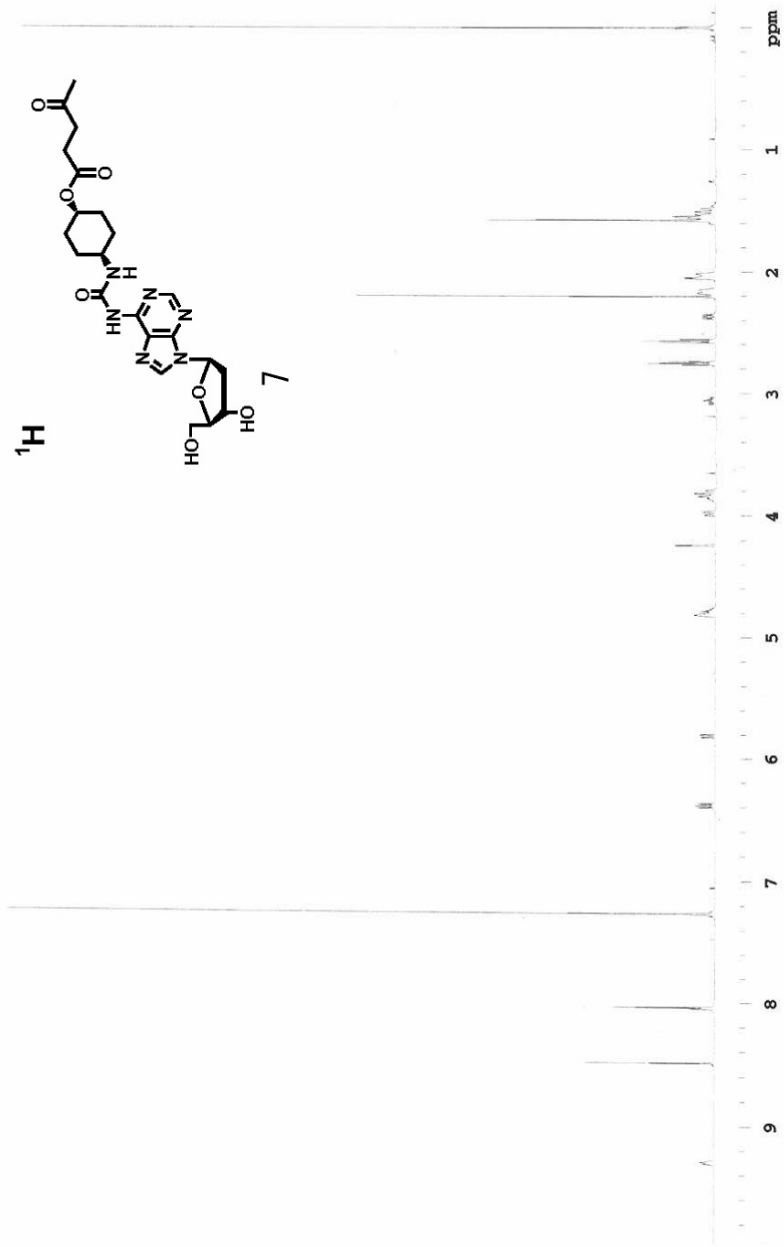

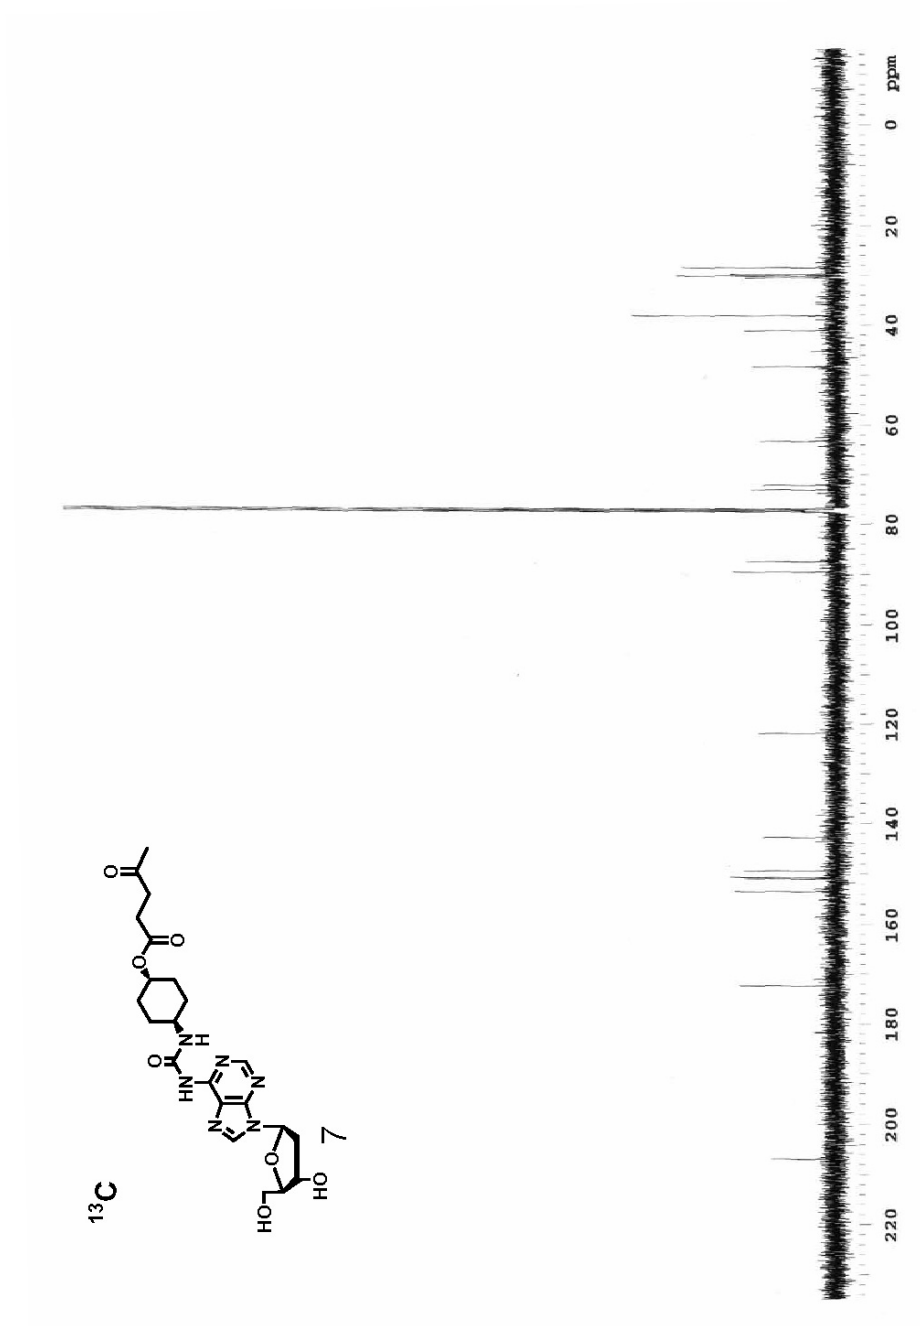

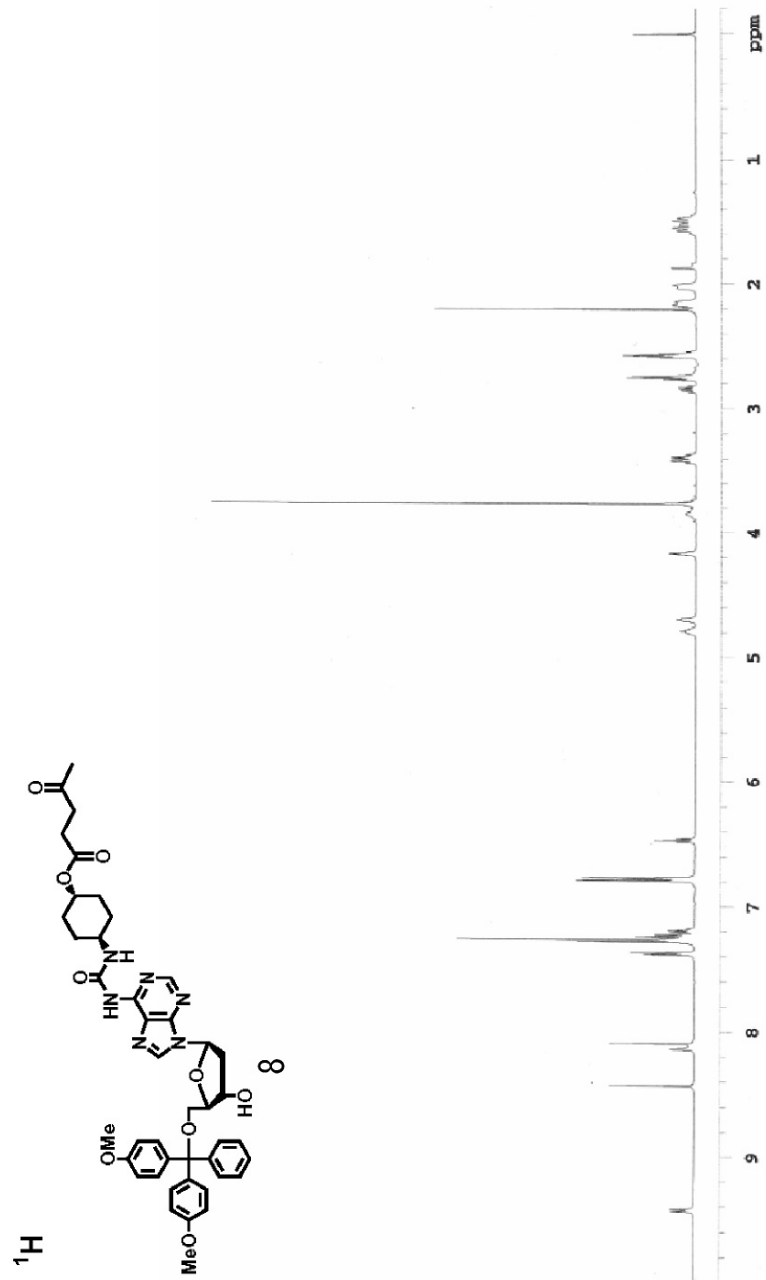

<sup>13</sup>C

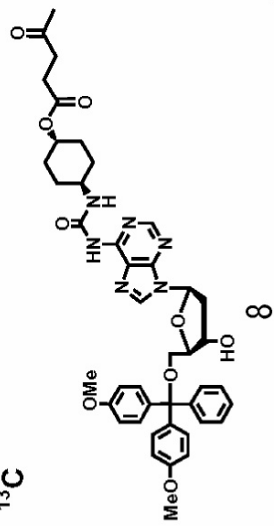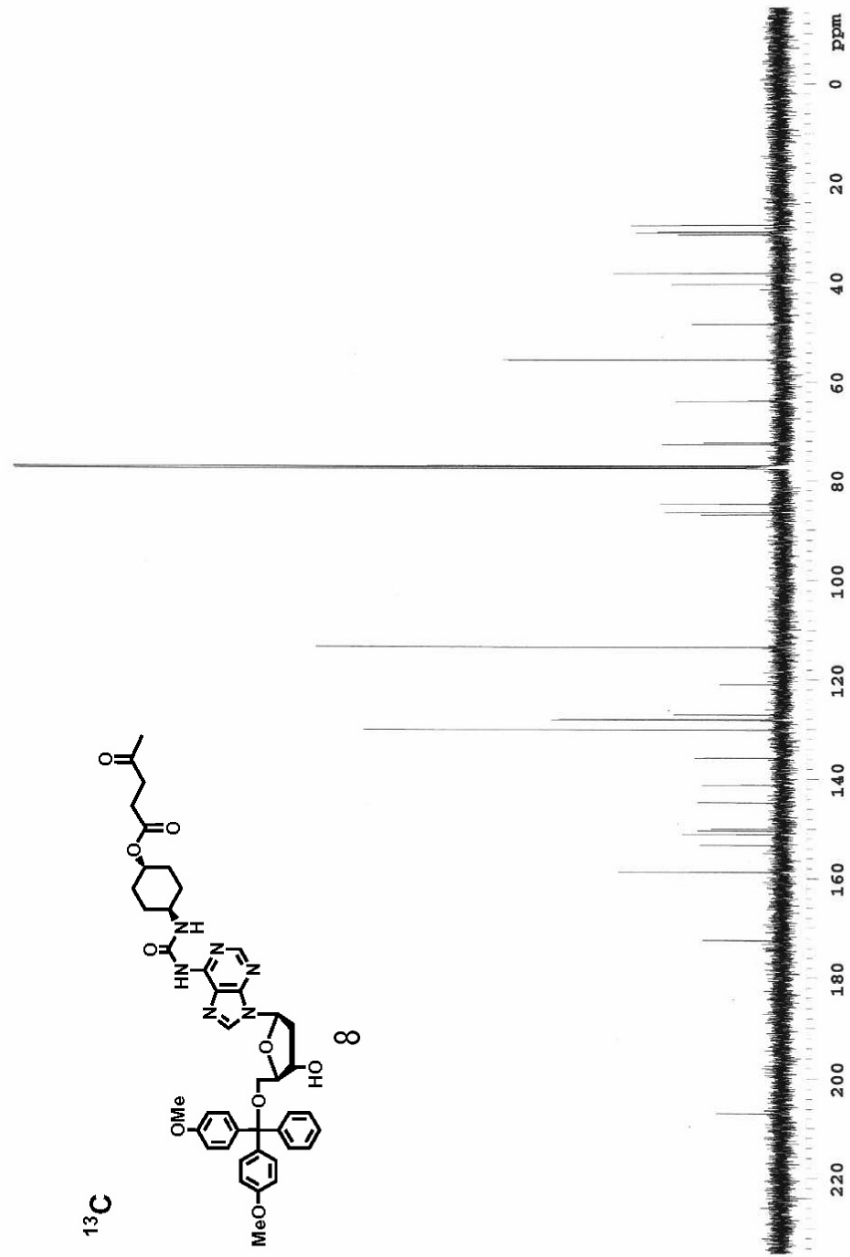



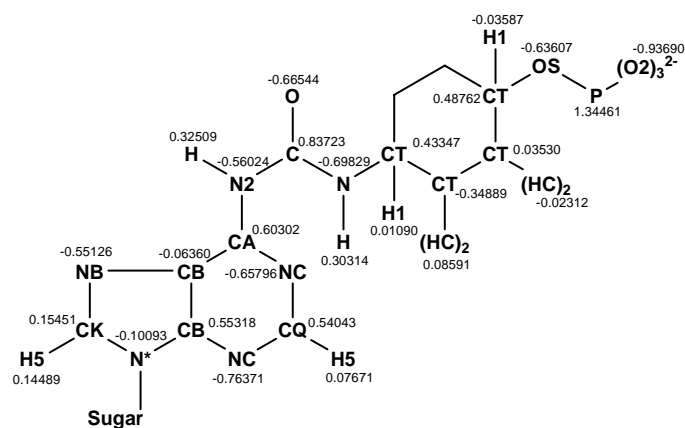

Fig. S1. Atom types and the atomic charges of the modified base incorporated to **probe7**

**Table S1.** Bond, angle and dihedral parameters for the modified base.

| bond <sup>a</sup>     | $K_r$<br>(kcal mol <sup>-1</sup> Å <sup>-2</sup> )        | $r_{eq}$<br>(Å)        |     |
|-----------------------|-----------------------------------------------------------|------------------------|-----|
| N2-C                  | 490.00                                                    | 1.335                  |     |
| angle <sup>b</sup>    | $K_\theta$<br>(kcal mol <sup>-1</sup> deg <sup>-2</sup> ) | $\theta_{eq}$<br>(deg) |     |
| CA-N2-C               | 67.400                                                    | 119.630                |     |
| N2-C-N                | 75.400                                                    | 111.700                |     |
| N2-C-O                | 74.100                                                    | 122.260                |     |
| H-N2-C                | 50.000                                                    | 120.000                |     |
| dihedral <sup>c</sup> | $V_n$<br>(kcal mol <sup>-1</sup> )                        | $\gamma$<br>(deg)      | n   |
| CA-N2-C-N             | 10.000                                                    | 180.0                  | 2.0 |
| CA-N2-C-O             | 10.000                                                    | 180.0                  | 2.0 |
| H-N2-C-N              | 2.000                                                     | 0.0                    | 1.0 |
| H-N2-C-O              | 2.000                                                     | 0.0                    | 1.0 |

a)  $E_{\text{bond}} = K_r(r-r_{\text{eq}})^2$ ; b)  $E_{\text{angle}} = K_\theta(\theta-\theta_{\text{eq}})^2$ ; c)  $E_{\text{dihedral}} = 0.5V_n[1+\cos(n\phi-\gamma)]$

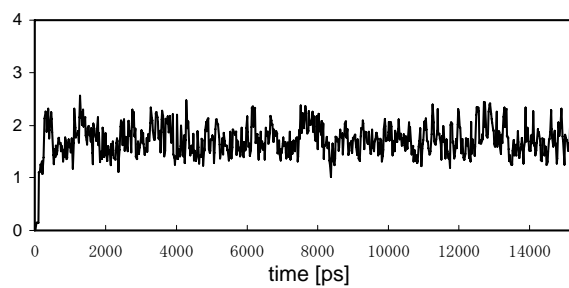

**Fig. S2** RMS deviations ( $\text{\AA}$ ) during the MD simulation
